# Supplementary material for: Computational study of silver-catalyzed stereoselective hydroalkylation of alkynes: Pauli repulsion controlled Z/E selectivity
Source: Royal Society of Chemistry journal article supplement (doi:10.1039/d1cc01917a), 2021-01-01
Supplement: d1cc01917a1.pdf [file d1cc01917a1.pdf]

## Electronic Supplementary Information

### Computational study of silver-catalyzed stereoselective hydroalkylation of alkynes: Pauli repulsion controlled *Z/E* selectivity

Lingfei Hu,<sup>a</sup> Han Gao,<sup>a</sup> Yanlei Hu,<sup>a</sup> Xiangying Lv,<sup>a</sup> Yan-Bo Wu,<sup>b</sup> and Gang Lu\*<sup>a</sup>

<sup>a</sup> School of Chemistry and Chemical Engineering, Key Laboratory of Colloid and Interface Chemistry, Ministry of Education, Shandong University, Jinan, Shandong 250100, China

<sup>b</sup> Key Lab for Materials of Energy Conversion and Storage of Shanxi Province and Key Lab of Chemical Biology and Molecular Engineering of Ministry of Education, Institute of Molecular Science, Shanxi University, Taiyuan, Shanxi 030006, China

Corresponding Author: [ganglu@sdu.edu.cn](mailto:ganglu@sdu.edu.cn)

### Table of Contents

|                                                                          |     |
|--------------------------------------------------------------------------|-----|
| Computational Details .....                                              | S2  |
| Alkyne C–H Activation with Possible Ag(I) Species.....                   | S6  |
| Competing Pathways .....                                                 | S7  |
| Charge Density Difference .....                                          | S9  |
| Energy Terms of EDA along IRC.....                                       | S10 |
| The in-plane $\pi$ Orbital along IRC .....                               | S12 |
| Cartesian Coordinates (Å) and Energies of the Optimized Structures ..... | S13 |
| References .....                                                         | S59 |

## Computational Details

The B3LYP density functional and a mixed basis set of LANL2DZ for Ag and 6-31G(d) for other atoms were used in the gas-phase geometry optimizations. All minima have zero imaginary frequency and all transition states have only one imaginary frequency and confirmed by intrinsic reaction coordinate (IRC) calculations. Single-point energies were calculated by using B3LYP with dispersion corrections (D3BJ)<sup>1</sup> and a mixed basis set of SDD for the transition metals and 6-311+G(d,p) for other atoms. Solvation energy corrections were calculated using the SMD model<sup>2</sup> with the solvent reported in the experimental conditions. The frontier molecular orbitals of fragments were computed at the HF/6-31G(d)-LANL2DZ(Ag) level of theory. All these calculations were carried out with Gaussian 09.<sup>3</sup>

To validate the conclusion based on the method used in the present study, we further computed the barriers of syn/anti-1,2 migration (**9-TS** and **8-TS**) using a few popular modern density functionals and basis sets. As shown in Table S1, although the absolute barriers of **8-TS** and **9-TS** differ by a few kcal/mol among the methods tested, the trend of barrier difference ( $\Delta\Delta G_{\text{sol}}^\ddagger$ ), i.e., the stereoselectivity of 1,2-migration, is only minimally affected by the choice of density functionals and basis sets in both optimization and single-point energy calculations.

Moreover, we performed DFT calculations using triple  $\zeta$  basis sets for both geometry optimizations and single-point energy calculations. Because the real catalyst systems are computationally demanding when locating transition states, we used the model transition states (**9-TS-model** and **8-TS-model**) for benchmark calculations. As shown Table S2, the trend of barrier difference ( $\Delta\Delta G_{\text{sol}}^\ddagger$ ) of syn/anti-to-Ag 1,2-migration is slightly affected by the choice of density functionals and triple  $\zeta$  basis sets. The results of DFT calculations with triple  $\zeta$  basis sets are consistent with those of the combination of double  $\zeta$  basis set for geometry optimization and triple  $\zeta$  basis set for single-point energy calculations.

Energy decomposition analysis (EDA) calculations at the B3LYP-D3BJ/6-311+G(d,p)-LANL2DZ (Ag) level of theory were performed by using the second-generation EDA based on absolutely localized orbitals (ALMO-EDA2) implemented in Q-Chem 5.2.<sup>4</sup> The complementary occupied-virtual pairs (COVPs) were computed to figure out the direction of charge transfer and the most significant orbitals. Mostly, the targeted C-C bonds in the two stereoselective migration transition states have different bond distances. To minimize the effect of early or late transition states in comparing each energy term between the migration pathways, we performed EDA calculations along the reaction coordinates obtained from IRC calculations. The reported energies in the radar charts are the average of  $\Delta\Delta E$  values at the two C-C bond distances that correspond to the syn- and anti-migration transition states. The geometries and orbitals were visualized using CYLview<sup>5</sup> and IQmol, respectively.

**Table S1. Comparison of barriers (in kcal/mol) of syn-to-metal (9-TS) and anti-to-metal (8-TS) 1,2-migration using different levels of theories.**

| Entry | Method for Single-Point Energy Calculation in Solvent Using SMD | Method for Gas-Phase Geometry Optimization | Barrier of <b>9-TS</b> ( $\Delta G_{\text{sol}}^{\ddagger}$ ) with respect to <b>7</b> | Barrier of <b>8-TS</b> ( $\Delta G_{\text{sol}}^{\ddagger}$ ) with respect to <b>7</b> | $\Delta\Delta G_{\text{sol}}^{\ddagger}$ ( <b>9-TS</b> – <b>8-TS</b> ) |
|-------|-----------------------------------------------------------------|--------------------------------------------|----------------------------------------------------------------------------------------|----------------------------------------------------------------------------------------|------------------------------------------------------------------------|
| 1     | B3LYP-D3BJ/<br>SDD-6-311+G(d,p)                                 | B3LYP/<br>LANL2DZ-6-31G(d)                 | 26.1                                                                                   | 23.3                                                                                   | 2.8                                                                    |
| 2     | M06/<br>SDD-6-311+G(d,p)                                        |                                            | 26.0                                                                                   | 23.1                                                                                   | 2.9                                                                    |
| 3     | M06L/<br>SDD-6-311+G(d,p)                                       |                                            | 27.9                                                                                   | 24.6                                                                                   | 3.3                                                                    |
| 4     | $\omega$ B97xD/<br>SDD-6-311+G(d,p)                             |                                            | 28.4                                                                                   | 25.1                                                                                   | 3.3                                                                    |
| 5     | B3LYP/<br>LANL2DZ-6-31G(d)                                      |                                            | 21.9                                                                                   | 18.9                                                                                   | 3.0                                                                    |
| 6     | B3LYP-D3BJ/<br>SDD-6-311+G(d,p)                                 | B3LYP-D3BJ/<br>LANL2DZ-6-31G(d)            | 27.9                                                                                   | 22.6                                                                                   | 5.3                                                                    |
| 7     | M06/<br>SDD-6-311+G(d,p)                                        |                                            | 28.0                                                                                   | 23.0                                                                                   | 5.0                                                                    |
| 8     | M06L/<br>SDD-6-311+G(d,p)                                       |                                            | 29.1                                                                                   | 24.6                                                                                   | 4.5                                                                    |
| 9     | $\omega$ B97xD/<br>SDD-6-311+G(d,p)                             |                                            | 30.0                                                                                   | 24.6                                                                                   | 5.4                                                                    |
| 10    | B3LYP-D3BJ/<br>LANL2DZ-6-31G(d)                                 |                                            | 27.0                                                                                   | 22.8                                                                                   | 4.2                                                                    |
| 11    | B3LYP-D3BJ/<br>SDD-6-311+G(d,p)                                 | M06/<br>LANL2DZ-6-31G(d)                   | 28.6                                                                                   | 24.3                                                                                   | 4.3                                                                    |
| 12    | M06/<br>SDD-6-311+G(d,p)                                        |                                            | 29.3                                                                                   | 24.9                                                                                   | 4.4                                                                    |
| 13    | M06L/<br>SDD-6-311+G(d,p)                                       |                                            | 30.8                                                                                   | 26.9                                                                                   | 3.9                                                                    |
| 14    | $\omega$ B97xD/<br>SDD-6-311+G(d,p)                             |                                            | 31.6                                                                                   | 26.3                                                                                   | 5.3                                                                    |
| 15    | M06/<br>LANL2DZ-6-31G(d)                                        |                                            | 27.5                                                                                   | 23.6                                                                                   | 3.9                                                                    |

**Table S2. Comparison of barriers (in kcal/mol) of syn-to-metal (9-TS-model) and anti-to-metal (8-TS-model) 1,2-migration using higher levels of theories.**

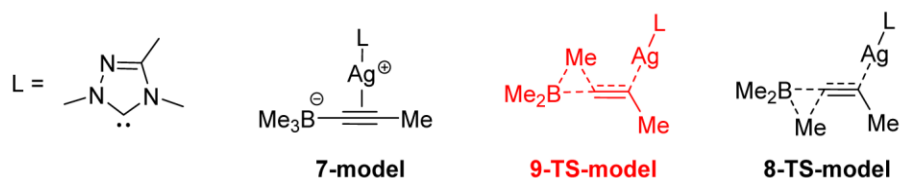

| Entry | Method for Single-Point Energy Calculation in Solvent Using SMD | Method for Gas-Phase Geometry Optimization | Barrier of <b>9-TS-model</b> ( $\Delta G_{\text{sol}}^{\ddagger}$ ) with respect to <b>7-model</b> | Barrier of <b>8-TS-model</b> ( $\Delta G_{\text{sol}}^{\ddagger}$ ) with respect to <b>7-model</b> | $\Delta\Delta G_{\text{sol}}^{\ddagger}$ ( <b>9-TS-model</b> – <b>8-TS-model</b> ) |
|-------|-----------------------------------------------------------------|--------------------------------------------|----------------------------------------------------------------------------------------------------|----------------------------------------------------------------------------------------------------|------------------------------------------------------------------------------------|
| 1     | B3LYP-D3BJ/<br>SDD-6-311+G(d,p)                                 | B3LYP/<br>LANL2DZ-<br>6-311+G(d,p)         | 23.7                                                                                               | 20.0                                                                                               | 3.7                                                                                |
| 2     | M06/<br>SDD-6-311+G(d,p)                                        |                                            | 23.5                                                                                               | 20.0                                                                                               | 3.5                                                                                |
| 3     | M06L/<br>SDD-6-311+G(d,p)                                       |                                            | 25.7                                                                                               | 21.7                                                                                               | 4.0                                                                                |
| 4     | $\omega$ B97xD/<br>SDD-6-311+G(d,p)                             |                                            | 25.9                                                                                               | 22.0                                                                                               | 3.9                                                                                |
| 5     | B3LYP/<br>LANL2DZ-6-31G(d)                                      |                                            | 21.1                                                                                               | 17.3                                                                                               | 3.8                                                                                |
| 6     | B3LYP-D3BJ/<br>SDD-6-311+G(d,p)                                 | B3LYP-D3BJ/<br>LANL2DZ-<br>6-311+G(d,p)    | 24.4                                                                                               | 20.8                                                                                               | 3.6                                                                                |
| 7     | M06/<br>SDD-6-311+G(d,p)                                        |                                            | 24.2                                                                                               | 20.5                                                                                               | 3.7                                                                                |
| 8     | M06L/<br>SDD-6-311+G(d,p)                                       |                                            | 26.4                                                                                               | 22.3                                                                                               | 4.1                                                                                |
| 9     | $\omega$ B97xD/<br>SDD-6-311+G(d,p)                             |                                            | 26.6                                                                                               | 22.8                                                                                               | 3.8                                                                                |
| 10    | B3LYP-D3BJ/<br>LANL2DZ-6-31G(d)                                 |                                            | 23.3                                                                                               | 19.8                                                                                               | 3.5                                                                                |
| 11    | B3LYP-D3BJ/<br>SDD-6-311+G(d,p)                                 | M06/<br>LANL2DZ-<br>6-311+G(d,p)           | 22.3                                                                                               | 20.4                                                                                               | 1.9                                                                                |
| 12    | M06/<br>SDD-6-311+G(d,p)                                        |                                            | 22.5                                                                                               | 20.2                                                                                               | 2.3                                                                                |
| 13    | M06L/<br>SDD-6-311+G(d,p)                                       |                                            | 24.7                                                                                               | 22.2                                                                                               | 2.5                                                                                |
| 14    | $\omega$ B97xD/<br>SDD-6-311+G(d,p)                             |                                            | 24.3                                                                                               | 21.9                                                                                               | 2.4                                                                                |
| 15    | M06/<br>LANL2DZ-6-31G(d)                                        |                                            | 20.4                                                                                               | 18.3                                                                                               | 2.1                                                                                |
| 16    | B3LYP-D3BJ/<br>SDD-6-311+G(d,p)                                 |                                            | 23.5                                                                                               | 20.1                                                                                               | 3.4                                                                                |

|    |                                     |                          |      |      |     |
|----|-------------------------------------|--------------------------|------|------|-----|
| 17 | M06/SDD-6-311+G(d,p)                | B3LYP/<br>def2-TZVP      | 23.4 | 20.0 | 3.4 |
| 18 | M06L/<br>SDD-6-311+G(d,p)           |                          | 25.4 | 21.6 | 3.8 |
| 19 | $\omega$ B97xD/<br>SDD-6-311+G(d,p) |                          | 25.7 | 22.1 | 3.6 |
| 20 | B3LYP/<br>def2-TZVP                 |                          | 22.4 | 18.8 | 3.6 |
| 21 | B3LYP-D3BJ/<br>SDD-6-311+G(d,p)     | B3LYP-D3BJ/<br>def2-TZVP | 22.9 | 19.9 | 3.0 |
| 22 | M06/<br>SDD-6-311+G(d,p)            |                          | 22.7 | 19.6 | 3.1 |
| 23 | M06L/<br>SDD-6-311+G(d,p)           |                          | 24.8 | 21.3 | 3.5 |
| 24 | $\omega$ B97xD/<br>SDD-6-311+G(d,p) |                          | 25.1 | 21.9 | 3.2 |
| 25 | B3LYP-D3BJ/<br>def2-TZVP            |                          | 23.3 | 20.3 | 3.0 |
| 26 | B3LYP-D3BJ/<br>SDD-6-311+G(d,p)     | M06/<br>def2-TZVP        | 23.5 | 20.1 | 3.4 |
| 27 | M06/<br>SDD-6-311+G(d,p)            |                          | 23.4 | 20.0 | 3.4 |
| 28 | M06L/<br>SDD-6-311+G(d,p)           |                          | 25.4 | 21.6 | 3.8 |
| 29 | $\omega$ B97xD/<br>SDD-6-311+G(d,p) |                          | 25.7 | 22.1 | 3.6 |
| 30 | M06/<br>def2-TZVP                   |                          | 22.4 | 18.8 | 3.6 |

## Alkyne C–H Activation with Possible Ag(I) Species

Under the experimental condition with L-Ag-Cl, LiO<sup>t</sup>Bu, and MeOH, we computed several possible Ag(I) species as the active catalyst. As shown in Fig. S1, the barriers of alkyne C–H activation by these active Ag(I) complexes are lower than 17 kcal/mol, and thus can be easily surmounted. It should be noted that the interactions with LiO<sup>t</sup>Bu significantly stabilize the L-Ag-OMe, L-Ag-O<sup>t</sup>Bu and L-Ag-Cl species, forming the complexes of **1**, **s8** and **s10**, respectively. Based on these complexes, the 6-membered transition states of C–H cleavages require quite low barriers, smaller than 12 kcal/mol. Because the protonation with MeOH is the final step in the overall catalytic cycle, which regenerates the L-Ag-OMe species, the complex **1** was chosen as the energy reference and reported in the main text.

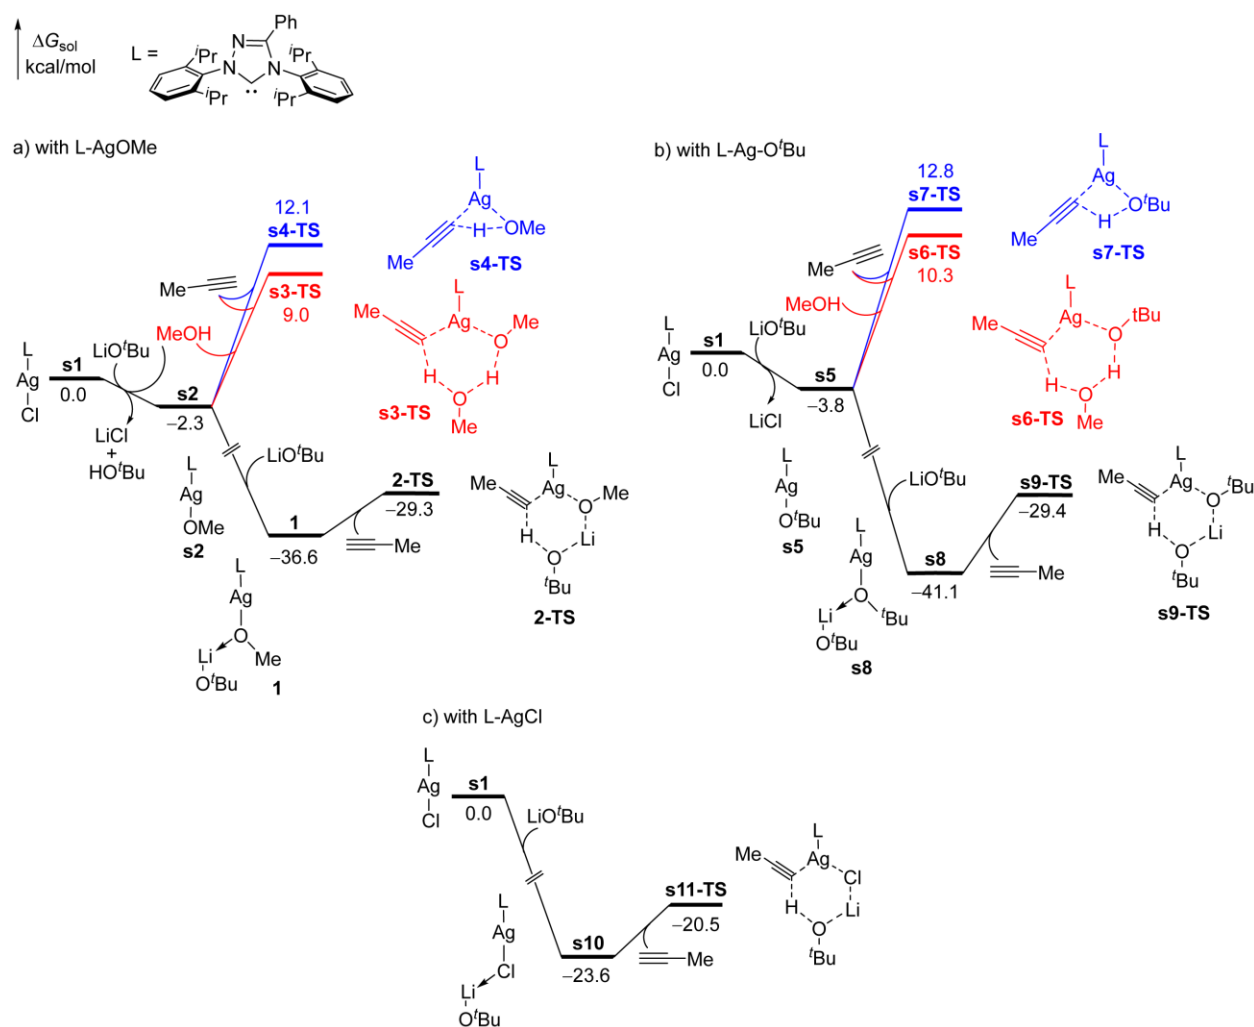

**Fig. S1.** Energy profile of alkyne C–H activation by possible Ag(I) species.

## Competing Pathways

The anti- and syn-to-Ag 1,2-migrations from alkynyl boronate **7** result in the formation of alkenyl Ag(I) intermediates **10** and **11**, respectively. The protonation of Ag–C bond in **10** can also be promoted by an addition trialkylboron via **s13-TS** (Fig. S2), which is slightly less favorable than the boron-assisted protonation transition state **12-TS** (Fig. 3). Further, the protonation with two MeOH is highly disfavored (**s12-TS**).

The protonation of Ag–C bond in **11** with boron assistance also requires a low barrier (**s14-TS**, Fig. S2). This indicates that the pathway for generating minor *E*-olefin can go through with the similar mechanism of forming major *Z*-olefin (the first Ag–C protonation, transmetalation and the second Ag–C protonation). The major difference lies in the 1,2-migration step, which determine the stereoselectivity.

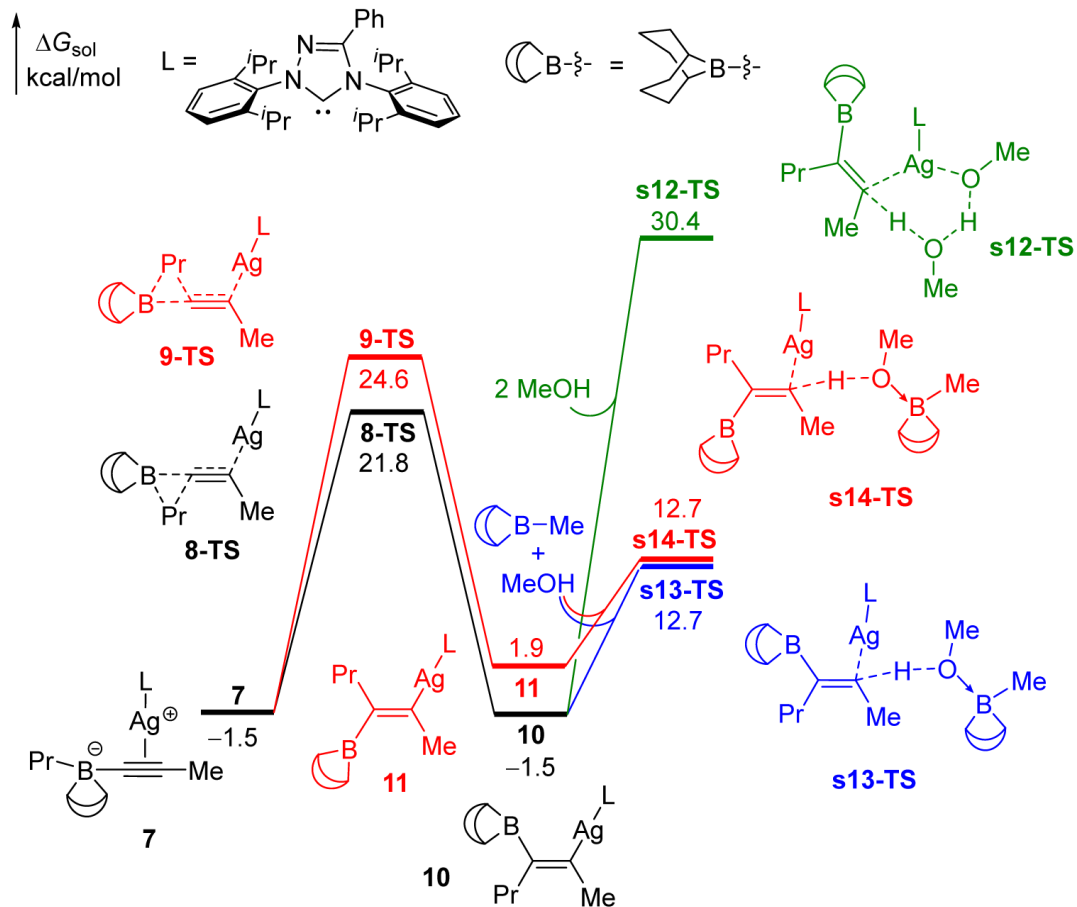

**Fig. S2.** Energy profiles of competing pathways of alkynyl boronate **7**.

We further computed several unproductive pathways to fully describe the possibilities of reaction mechanisms. During the process of the reaction, the intermediates of alkynyl Ag (**4**), methoxyl Ag (**13**) and alkenyl Ag (**15**) are generated, which could react with the alkylboron reagent via transmetalation mechanism. As shown in Fig. S3, these unproductive pathways (**6a-TS**, **14a-TS** and **16a-TS**) are less favorable than the corresponding productive pathways (**6-TS**, **14-TS** and **16-TS**), respectively.

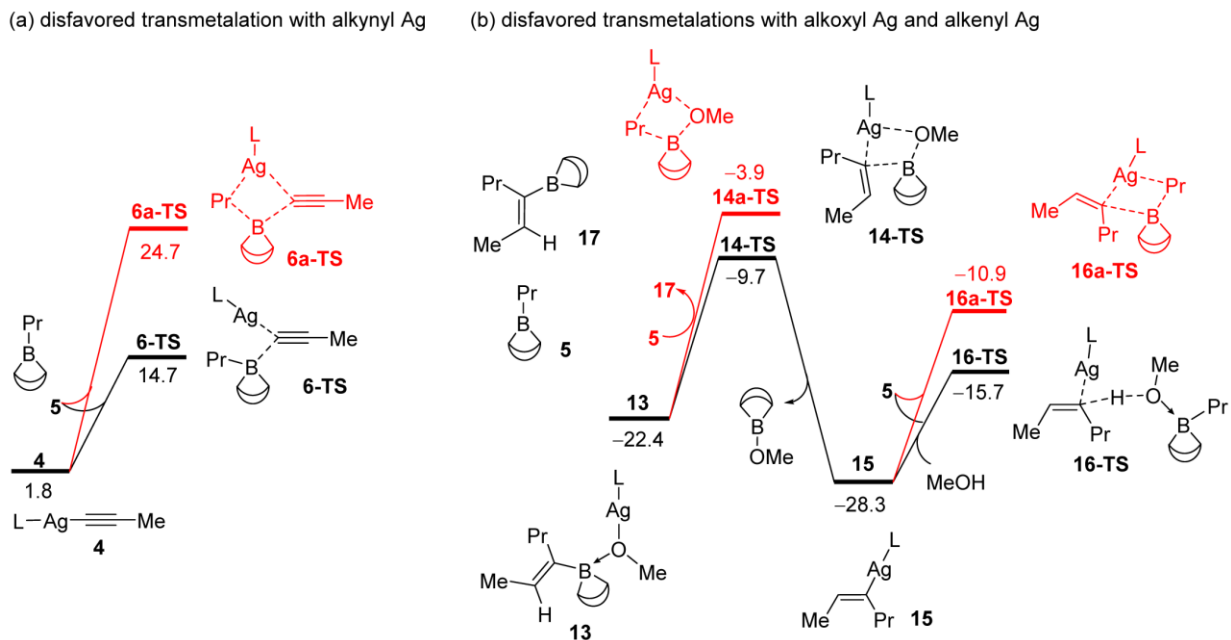

**Fig. S3.** Energy profiles of disfavored transmetalation pathways.



## Charge Density Difference

To understand the change of alkyne  $\pi$  electron density when interacting with cationic silver complexes, we performed calculations of charge density difference to study the areas of electron gain and loss. As shown in Fig. S4, the alkyne  $\pi$  electron of intermediate **7** is depleted (cyan) at the opposite site of Ag and accumulated (yellow) at the same side of Ag. This unequal redistribution of  $\pi$  electron density leads to different  $\sigma(\pi)$  Pauli repulsion (see detailed discussions in the main text), thus distinguishing the reactivity when the migrated alkyl groups approaching from different sides of silver.

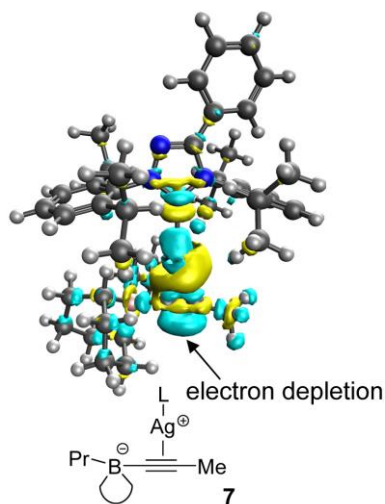

**Fig. S4.** Charge density difference (yellow: electron gain; cyan: electron loss) in complex **7**.

## Energy Terms of EDA along IRC

The computed energy terms of EDA results along the IRC of **8-TS** and **9-TS** were shown in Tables S3 and S4. The change trends of these energy terms shown in Fig. 5a in the manuscript were plotted from these data. Clearly, the disfavored **9-TS** always has stronger interactions of charge transfer ( $\Delta E_{ct}$ ), electrostatics ( $\Delta E_{elstat}$ ), polarization ( $\Delta E_{pol}$ ) and dispersion ( $\Delta E_{disp}$ ) than the favored **8-TS** along the process of 1,2-migration. However, these stabilizing interactions are suppressed by the destabilizing interactions of distortion ( $\Delta E_{dist}$ ) and Pauli repulsion ( $\Delta E_{Pauli}$ ).

The radar chart shown in Fig. S5 quantitatively demonstrates the contribution of each energy term to the barrier difference of the two transition states. Clearly, the difference of Pauli repulsion ( $\Delta\Delta E_{Pauli} = 26.2$  kcal/mol) is the most significant effect on destabilizing **9-TS**. The deformation of two fragments also destabilizes **9-TS** albeit with relatively low importance ( $\Delta\Delta E_{dist} = 7.0$  kcal/mol).

**Table S3. EDA energy terms of anti-to-metal 1,2-migration (8-TS) along IRC**

| Energy terms<br>(in kcal/mol)<br>$r(\text{C-C})$<br>in <b>8-TS</b> (in Å) | $\Delta E_{dist}$ | $\Delta E_{Pauli}$ | $\Delta E_{ct}$ | $\Delta E_{elstat}$ | $\Delta E_{pol}$ | $\Delta E_{disp}$ |
|---------------------------------------------------------------------------|-------------------|--------------------|-----------------|---------------------|------------------|-------------------|
| 2.14                                                                      | 62.72             | 313.71             | -84.27          | -168.75             | -99.62           | -29.54            |
| 2.11                                                                      | 64.50             | 336.88             | -88.73          | -178.42             | -108.34          | -30.88            |
| 2.08                                                                      | 66.51             | 362.28             | -93.65          | -188.42             | -118.66          | -32.34            |
| 2.05                                                                      | 68.75             | 390.57             | -99.04          | -199.10             | -130.81          | -34.01            |
| 2.02                                                                      | 71.17             | 420.52             | -104.87         | -209.88             | -144.31          | -35.78            |
| 1.98                                                                      | 73.74             | 453.21             | -111.13         | -220.90             | -159.97          | -37.76            |
| 1.95 (TS)                                                                 | 76.42             | 488.17             | -117.81         | -232.08             | -177.54          | -39.89            |
| 1.92                                                                      | 79.30             | 525.66             | -124.85         | -243.51             | -197.27          | -42.21            |
| 1.88                                                                      | 82.25             | 565.44             | -132.19         | -254.83             | -219.26          | -44.68            |
| 1.85                                                                      | 85.23             | 607.26             | -139.70         | -266.18             | -243.28          | -47.28            |

**Table S4. EDA energy terms of syn-to-metal 1,2-migration (9-TS) along IRC**

| Energy terms<br>(in kcal/mol)<br>$r(\text{C-C})$<br>in <b>9-TS</b> (in Å) | $\Delta E_{dist}$ | $\Delta E_{Pauli}$ | $\Delta E_{ct}$ | $\Delta E_{elstat}$ | $\Delta E_{pol}$ | $\Delta E_{disp}$ |
|---------------------------------------------------------------------------|-------------------|--------------------|-----------------|---------------------|------------------|-------------------|
| 2.12                                                                      | 73.05             | 351.41             | -92.98          | -183.82             | -116.51          | -31.53            |
| 2.10                                                                      | 74.21             | 372.15             | -97.05          | -191.62             | -125.09          | -32.76            |
| 2.07                                                                      | 75.53             | 394.49             | -101.37         | -199.76             | -134.82          | -34.08            |
| 2.04 (TS)                                                                 | 77.00             | 420.34             | -106.25         | -208.85             | -146.54          | -35.63            |
| 2.00                                                                      | 78.62             | 457.31             | -113.82         | -220.41             | -162.03          | -37.28            |
| 1.98                                                                      | 80.38             | 478.03             | -117.05         | -227.65             | -174.79          | -39.14            |
| 1.95                                                                      | 82.22             | 510.97             | -123.10         | -237.76             | -191.77          | -41.21            |

|      |       |        |         |         |         |        |
|------|-------|--------|---------|---------|---------|--------|
| 1.91 | 84.14 | 546.54 | -131.86 | -247.91 | -211.08 | -43.44 |
| 1.88 | 86.11 | 584.06 | -136.12 | -258.40 | -231.83 | -45.83 |
| 1.84 | 88.14 | 623.91 | -142.96 | -268.87 | -254.81 | -48.36 |

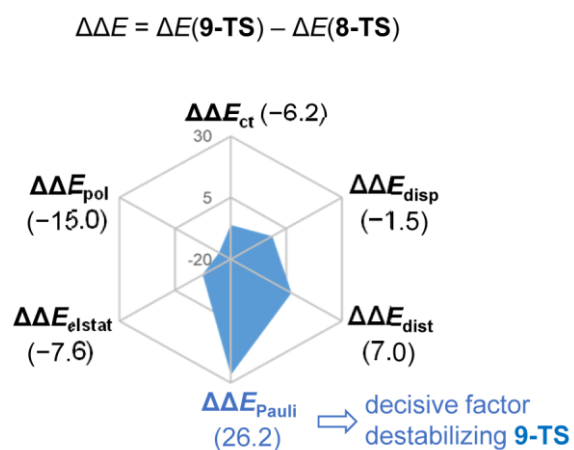

**Fig. S5.** Radar chart of the difference of energy terms between **9-TS** and **8-TS**.

## The in-plane $\pi$ Orbital along IRC

We computed the in-plane  $\pi$  orbital of L-Ag-alkyne fragment for three representative structures along IRC. The results clearly show that these in-plane  $\pi$  orbitals are accumulated at the same side of Ag and depleted at the opposite side. This indicates the  $\sigma(\pi)$  Pauli repulsion can distinguish the syn- and anti-1,2-migration when the migrated group gradually approaching to L-Ag-alkyne from different sides. Thus, the insight of the unequal redistribution of alkyne in-plane  $\pi$  orbitals is solid for explaining the difference of Pauli repulsion.

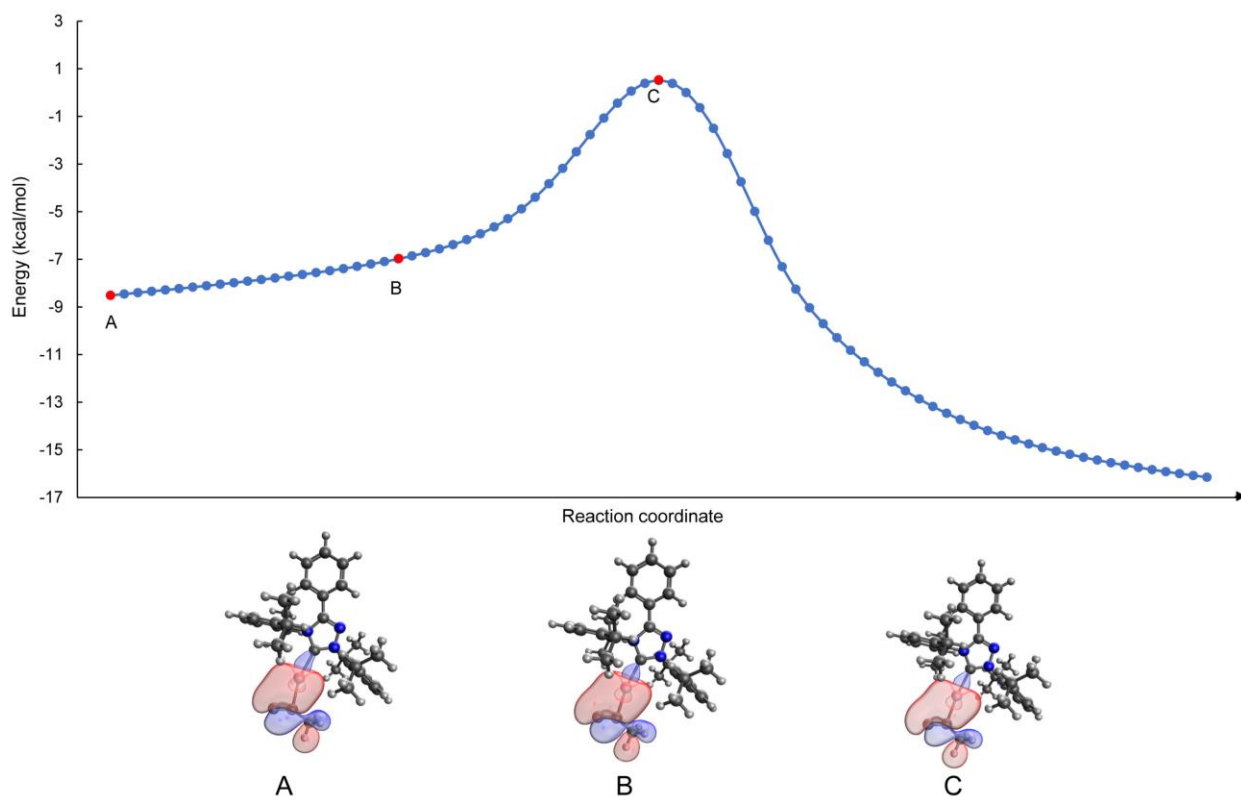

**Fig. S6.** The in-plane  $\pi$  orbital of L-Ag-alkyne fragment along reaction coordinates.

## Cartesian Coordinates (Å) and Energies of the Optimized Structures

1  
B3LYP SCF energy: -1908.73525678 a.u.  
B3LYP enthalpy: -1907.871906 a.u.  
B3LYP free energy: -1908.015699 a.u.  
B3LYP-D3BJ SCF energy in solution: -1910.72784320 a.u.  
B3LYP-D3BJ enthalpy in solution: -1909.864492 a.u.  
B3LYP-D3BJ free energy in solution: -1910.008285 a.u.  
Three lowest frequencies (cm<sup>-1</sup>): 9.2206 13.7256 16.6562

### Cartesian coordinates

| ATOM | X         | Y         | Z         |
|------|-----------|-----------|-----------|
| N    | 1.600895  | -0.370716 | -0.108544 |
| N    | 0.604746  | 1.476568  | -0.454644 |
| C    | 0.491572  | 0.342967  | 0.254966  |
| C    | 2.337723  | 0.380832  | -1.026025 |
| C    | 1.890139  | -1.682879 | 0.434813  |
| C    | 2.731889  | -1.773336 | 1.561757  |
| C    | 1.294454  | -2.809281 | -0.170627 |
| C    | 2.983373  | -3.051903 | 2.074235  |
| C    | 1.584071  | -4.061449 | 0.386936  |
| C    | 2.419023  | -4.184849 | 1.494172  |
| H    | 3.626847  | -3.159292 | 2.942534  |
| H    | 1.142028  | -4.951048 | -0.051525 |
| H    | 2.626750  | -5.167246 | 1.909333  |
| C    | -0.327309 | 2.581577  | -0.457000 |
| C    | -1.367026 | 2.577766  | -1.408036 |
| C    | -0.148051 | 3.607448  | 0.489292  |
| C    | -2.258037 | 3.657272  | -1.377186 |
| C    | -1.069170 | 4.661631  | 0.470699  |
| C    | -2.113851 | 4.685522  | -0.449096 |
| H    | -3.077558 | 3.690186  | -2.087464 |
| H    | -0.966795 | 5.471865  | 1.186707  |
| H    | -2.821008 | 5.510528  | -0.443421 |
| C    | 0.997853  | 3.615342  | 1.495696  |
| C    | 0.486524  | 3.689279  | 2.947165  |
| C    | 1.990911  | 4.754976  | 1.192032  |
| H    | 1.548404  | 2.674432  | 1.396588  |
| H    | -0.202157 | 2.866071  | 3.167855  |
| H    | 1.327171  | 3.631045  | 3.648703  |
| H    | -0.042595 | 4.628706  | 3.142860  |
| H    | 2.390347  | 4.669199  | 0.175782  |
| H    | 1.511433  | 5.736513  | 1.283135  |
| H    | 2.831988  | 4.727085  | 1.895054  |
| C    | 3.356078  | -0.554331 | 2.235088  |
| C    | 4.895958  | -0.621344 | 2.224087  |
| C    | 2.816119  | -0.373901 | 3.667860  |
| H    | 3.068566  | 0.337114  | 1.668861  |
| H    | 5.282823  | -0.721053 | 1.204573  |
| H    | 5.316966  | 0.291289  | 2.661292  |
| H    | 5.266274  | -1.470333 | 2.810233  |

|    |           |           |           |
|----|-----------|-----------|-----------|
| H  | 1.724048  | -0.286734 | 3.672397  |
| H  | 3.087511  | -1.221249 | 4.307927  |
| H  | 3.234199  | 0.533191  | 4.119868  |
| C  | -1.502313 | 1.492406  | -2.471309 |
| C  | -0.906735 | 1.989830  | -3.806417 |
| C  | -2.947390 | 0.995579  | -2.656999 |
| H  | -0.907206 | 0.629448  | -2.153018 |
| H  | 0.140824  | 2.287220  | -3.688883 |
| H  | -0.958419 | 1.198774  | -4.563787 |
| H  | -1.465546 | 2.854337  | -4.184437 |
| H  | -3.383185 | 0.602229  | -1.731889 |
| H  | -3.605838 | 1.786239  | -3.035201 |
| H  | -2.961083 | 0.188111  | -3.398213 |
| C  | 0.369740  | -2.721605 | -1.382578 |
| C  | -1.043705 | -3.239774 | -1.049578 |
| C  | 0.958115  | -3.463475 | -2.599907 |
| H  | 0.269460  | -1.669162 | -1.665220 |
| H  | -1.484141 | -2.696230 | -0.207079 |
| H  | -1.709569 | -3.112017 | -1.909611 |
| H  | -1.029358 | -4.305318 | -0.792307 |
| H  | 1.940262  | -3.066222 | -2.879626 |
| H  | 1.071647  | -4.535437 | -2.401087 |
| H  | 0.291171  | -3.355334 | -3.462481 |
| C  | -2.810526 | -0.850510 | 3.983124  |
| O  | -2.827711 | -0.579635 | 2.605237  |
| Ag | -1.098266 | -0.152469 | 1.537491  |
| H  | -2.172173 | -1.713571 | 4.239574  |
| H  | -2.455792 | 0.008954  | 4.577792  |
| H  | -3.828517 | -1.085639 | 4.336066  |
| C  | 3.619700  | 0.052786  | -1.675824 |
| C  | 4.181405  | -1.234890 | -1.700022 |
| C  | 4.300295  | 1.102475  | -2.323221 |
| C  | 5.394547  | -1.460071 | -2.353052 |
| H  | 3.680513  | -2.065485 | -1.221348 |
| C  | 5.507411  | 0.868659  | -2.973118 |
| H  | 3.868599  | 2.096890  | -2.308791 |
| C  | 6.062012  | -0.414176 | -2.989538 |
| H  | 5.813162  | -2.462324 | -2.363934 |
| H  | 6.018093  | 1.691084  | -3.465893 |
| H  | 7.005959  | -0.595550 | -3.495709 |
| N  | 1.723115  | 1.522346  | -1.243685 |
| Li | -4.137679 | -0.805205 | 1.371852  |
| O  | -5.027118 | -1.038713 | -0.022209 |
| C  | -5.949035 | -1.566581 | -0.898740 |
| C  | -6.973018 | -2.442975 | -0.134985 |
| C  | -6.711401 | -0.428658 | -1.622513 |
| C  | -5.235427 | -2.447952 | -1.955362 |
| H  | -6.447986 | -3.252703 | 0.387654  |
| H  | -7.489511 | -1.834610 | 0.618045  |
| H  | -7.729935 | -2.891452 | -0.794176 |
| H  | -6.004919 | 0.202166  | -2.175525 |
| H  | -7.465253 | -0.802907 | -2.329390 |

|   |           |           |           |
|---|-----------|-----------|-----------|
| H | -7.215580 | 0.204206  | -0.882113 |
| H | -5.930831 | -2.895175 | -2.679549 |
| H | -4.503530 | -1.846239 | -2.508341 |
| H | -4.693197 | -3.257958 | -1.451288 |

Propyne

|                                     |                    |          |          |
|-------------------------------------|--------------------|----------|----------|
| B3LYP SCF energy:                   | -116.65327005 a.u. |          |          |
| B3LYP enthalpy:                     | -116.592615 a.u.   |          |          |
| B3LYP free energy:                  | -116.620746 a.u.   |          |          |
| B3LYP-D3BJ SCF energy in solution:  | -116.70212004 a.u. |          |          |
| B3LYP-D3BJ enthalpy in solution:    | -116.641465 a.u.   |          |          |
| B3LYP-D3BJ free energy in solution: | -116.669596 a.u.   |          |          |
| Three lowest frequencies (cm-1):    | 346.8899           | 346.8909 | 600.4941 |

Cartesian coordinates

| ATOM | X         | Y         | Z         |
|------|-----------|-----------|-----------|
| C    | 0.000000  | 0.000000  | 1.426148  |
| C    | 0.000000  | 0.000000  | 0.218947  |
| H    | 0.000000  | 0.000000  | 2.492236  |
| C    | 0.000000  | 0.000000  | -1.241448 |
| H    | 0.000000  | 1.022440  | -1.638041 |
| H    | 0.885459  | -0.511220 | -1.638041 |
| H    | -0.885459 | -0.511220 | -1.638041 |

2-TS

|                                     |                     |        |         |
|-------------------------------------|---------------------|--------|---------|
| B3LYP SCF energy:                   | -2025.38395919 a.u. |        |         |
| B3LYP enthalpy:                     | -2024.462564 a.u.   |        |         |
| B3LYP free energy:                  | -2024.616960 a.u.   |        |         |
| B3LYP-D3BJ SCF energy in solution:  | -2027.43203795 a.u. |        |         |
| B3LYP-D3BJ enthalpy in solution:    | -2026.510643 a.u.   |        |         |
| B3LYP-D3BJ free energy in solution: | -2026.665039 a.u.   |        |         |
| Three lowest frequencies (cm-1):    | -943.9102           | 9.6661 | 11.7859 |
| Imaginary frequency:                | -943.9102 cm-1      |        |         |

Cartesian coordinates

| ATOM | X         | Y         | Z         |
|------|-----------|-----------|-----------|
| N    | -1.294789 | 0.901634  | -0.064524 |
| N    | -1.781158 | -1.163807 | -0.052397 |
| C    | -0.720855 | -0.340260 | 0.042586  |
| C    | -2.675825 | 0.760581  | -0.213792 |
| C    | -0.511441 | 2.119928  | -0.024148 |
| C    | -0.351746 | 2.781373  | 1.210250  |
| C    | 0.075077  | 2.582202  | -1.222167 |
| C    | 0.403640  | 3.961044  | 1.211984  |
| C    | 0.821904  | 3.765030  | -1.156193 |
| C    | 0.982073  | 4.451341  | 0.044850  |
| H    | 0.545339  | 4.497187  | 2.145591  |
| H    | 1.288439  | 4.149310  | -2.058436 |

|   |           |           |           |
|---|-----------|-----------|-----------|
| H | 1.566468  | 5.367137  | 0.072070  |
| C | -1.753010 | -2.606614 | -0.069220 |
| C | -1.741148 | -3.254517 | -1.319798 |
| C | -1.764513 | -3.300104 | 1.156987  |
| C | -1.721808 | -4.654922 | -1.316082 |
| C | -1.739325 | -4.699112 | 1.099390  |
| C | -1.715210 | -5.369589 | -0.121175 |
| H | -1.716611 | -5.191564 | -2.260007 |
| H | -1.743325 | -5.271780 | 2.020953  |
| H | -1.697819 | -6.456147 | -0.140627 |
| C | -1.873750 | -2.573862 | 2.494509  |
| C | -1.064338 | -3.238160 | 3.620616  |
| C | -3.357572 | -2.427765 | 2.896480  |
| H | -1.465411 | -1.566502 | 2.363833  |
| H | -0.015914 | -3.373819 | 3.336336  |
| H | -1.090117 | -2.605536 | 4.514720  |
| H | -1.474379 | -4.214673 | 3.903808  |
| H | -3.928309 | -1.900097 | 2.125472  |
| H | -3.818283 | -3.412062 | 3.044657  |
| H | -3.445882 | -1.867870 | 3.835224  |
| C | -0.954793 | 2.273685  | 2.516375  |
| C | -2.037908 | 3.234933  | 3.046544  |
| C | 0.136808  | 2.021340  | 3.575625  |
| H | -1.438885 | 1.312180  | 2.317504  |
| H | -2.836725 | 3.390774  | 2.313658  |
| H | -2.487352 | 2.829456  | 3.960631  |
| H | -1.611743 | 4.214789  | 3.293417  |
| H | 0.917615  | 1.351583  | 3.195697  |
| H | 0.610060  | 2.961024  | 3.887448  |
| H | -0.311559 | 1.571510  | 4.469952  |
| C | -1.809575 | -2.486805 | -2.636745 |
| C | -3.246147 | -2.519015 | -3.199001 |
| C | -0.794855 | -2.986688 | -3.680127 |
| H | -1.562518 | -1.440647 | -2.431078 |
| H | -3.957261 | -2.098900 | -2.480939 |
| H | -3.307288 | -1.936708 | -4.126242 |
| H | -3.555370 | -3.546728 | -3.424703 |
| H | 0.228944  | -2.944735 | -3.294261 |
| H | -0.999397 | -4.016575 | -3.994636 |
| H | -0.844103 | -2.358199 | -4.576836 |
| C | -0.079304 | 1.866501  | -2.562768 |
| C | 1.283136  | 1.414118  | -3.124920 |
| C | -0.834820 | 2.739322  | -3.585768 |
| H | -0.677190 | 0.964020  | -2.403651 |
| H | 1.807652  | 0.750255  | -2.430322 |
| H | 1.137277  | 0.873900  | -4.068098 |
| H | 1.935326  | 2.270642  | -3.331213 |
| H | -1.827925 | 3.023579  | -3.220900 |
| H | -0.283330 | 3.659308  | -3.812328 |
| H | -0.964576 | 2.191147  | -4.526187 |
| C | 2.286147  | -1.058548 | 3.515025  |
| O | 2.472518  | -0.207967 | 2.427418  |



|    |           |           |           |
|----|-----------|-----------|-----------|
| Ag | 1.397560  | -0.768557 | 0.392963  |
| H  | 1.295424  | -0.924345 | 3.991562  |
| H  | 2.363161  | -2.129625 | 3.244872  |
| H  | 3.034785  | -0.884391 | 4.312508  |
| C  | -3.710737 | 1.804082  | -0.342458 |
| C  | -3.436792 | 3.151210  | -0.632938 |
| C  | -5.052556 | 1.406156  | -0.181927 |
| C  | -4.479963 | 4.070617  | -0.758275 |
| H  | -2.418314 | 3.489909  | -0.765611 |
| C  | -6.085874 | 2.328242  | -0.309573 |
| H  | -5.269401 | 0.368039  | 0.043060  |
| C  | -5.804798 | 3.666727  | -0.597687 |
| H  | -4.248342 | 5.107590  | -0.984395 |
| H  | -7.113849 | 2.001545  | -0.179836 |
| H  | -6.612216 | 4.387134  | -0.694810 |
| N  | -2.983093 | -0.515995 | -0.209794 |
| Li | 3.878422  | 0.485415  | 1.654076  |
| O  | 4.837821  | 0.703824  | 0.171436  |
| C  | 6.087432  | 1.023823  | -0.411272 |
| C  | 5.862281  | 1.519149  | -1.853224 |
| C  | 6.732602  | 2.137325  | 0.429599  |
| C  | 6.991219  | -0.224954 | -0.413868 |
| H  | 5.385308  | 0.737151  | -2.454631 |
| H  | 5.202381  | 2.394164  | -1.850249 |
| H  | 6.806420  | 1.797500  | -2.338327 |
| H  | 6.888513  | 1.794115  | 1.460370  |
| H  | 7.705402  | 2.440691  | 0.022725  |
| H  | 6.080664  | 3.018496  | 0.456184  |
| H  | 7.973748  | -0.013648 | -0.854466 |
| H  | 7.143227  | -0.582173 | 0.611736  |
| H  | 6.523589  | -1.033678 | -0.985854 |
| C  | 3.123535  | -2.394914 | -1.104819 |
| C  | 3.421216  | -1.254244 | -0.740125 |
| H  | 4.197779  | -0.206076 | -0.371419 |
| C  | 2.843364  | -3.756399 | -1.569999 |
| H  | 3.233326  | -4.508286 | -0.872061 |
| H  | 1.766711  | -3.935335 | -1.675199 |
| H  | 3.305161  | -3.941307 | -2.548499 |

3

|                                     |                                  |
|-------------------------------------|----------------------------------|
| B3LYP SCF energy:                   | -2025.40380334 a.u.              |
| B3LYP enthalpy:                     | -2024.476167 a.u.                |
| B3LYP free energy:                  | -2024.630513 a.u.                |
| B3LYP-D3BJ SCF energy in solution:  | -2027.45465945 a.u.              |
| B3LYP-D3BJ enthalpy in solution:    | -2026.527023 a.u.                |
| B3LYP-D3BJ free energy in solution: | -2026.681369 a.u.                |
| Three lowest frequencies (cm-1):    | 6.2130      14.7575      15.2289 |

Cartesian coordinates

| ATOM | X | Y | Z |
|------|---|---|---|
|------|---|---|---|

|   |           |           |           |
|---|-----------|-----------|-----------|
| N | 1.344056  | -0.884330 | -0.057559 |
| N | 1.849746  | 1.163931  | 0.177620  |
| C | 0.783309  | 0.368079  | -0.024048 |
| C | 2.725164  | -0.775756 | 0.116809  |
| C | 0.553360  | -2.075449 | -0.289887 |
| C | -0.023653 | -2.731975 | 0.817060  |
| C | 0.378612  | -2.517891 | -1.617575 |
| C | -0.775556 | -3.885080 | 0.556024  |
| C | -0.384051 | -3.675515 | -1.815271 |
| C | -0.952655 | -4.355909 | -0.742073 |
| H | -1.231259 | -4.417816 | 1.385218  |
| H | -0.535342 | -4.044588 | -2.825450 |
| H | -1.539463 | -5.253669 | -0.918154 |
| C | 1.850373  | 2.604457  | 0.276093  |
| C | 1.843653  | 3.361319  | -0.911095 |
| C | 1.889949  | 3.186797  | 1.558737  |
| C | 1.860092  | 4.755871  | -0.780932 |
| C | 1.909935  | 4.584514  | 1.626503  |
| C | 1.891017  | 5.362009  | 0.471109  |
| H | 1.854089  | 5.373127  | -1.674288 |
| H | 1.939524  | 5.071360  | 2.596090  |
| H | 1.903790  | 6.446072  | 0.548125  |
| C | 1.963469  | 2.348840  | 2.831347  |
| C | 1.048716  | 2.873918  | 3.951619  |
| C | 3.424609  | 2.238963  | 3.316302  |
| H | 1.620070  | 1.337681  | 2.588379  |
| H | 0.011355  | 2.959282  | 3.613958  |
| H | 1.071995  | 2.182294  | 4.801651  |
| H | 1.373739  | 3.852933  | 4.322776  |
| H | 4.064483  | 1.801838  | 2.543548  |
| H | 3.825027  | 3.227389  | 3.572993  |
| H | 3.483564  | 1.608192  | 4.211605  |
| C | 0.147199  | -2.257280 | 2.257355  |
| C | 0.953870  | -3.275123 | 3.090381  |
| C | -1.210711 | -1.948936 | 2.918083  |
| H | 0.716463  | -1.322672 | 2.244219  |
| H | 1.942380  | -3.465775 | 2.657751  |
| H | 1.097540  | -2.895767 | 4.108664  |
| H | 0.428554  | -4.234867 | 3.165828  |
| H | -1.765075 | -1.172698 | 2.375101  |
| H | -1.835171 | -2.849251 | 2.981924  |
| H | -1.047125 | -1.595088 | 3.943106  |
| C | 1.869272  | 2.730816  | -2.299863 |
| C | 3.247164  | 2.937639  | -2.961707 |
| C | 0.731113  | 3.247427  | -3.199731 |
| H | 1.720018  | 1.652988  | -2.188928 |
| H | 4.050519  | 2.523220  | -2.342755 |
| H | 3.278197  | 2.443734  | -3.940323 |
| H | 3.457636  | 4.002515  | -3.117307 |
| H | -0.247898 | 3.066362  | -2.744280 |
| H | 0.824818  | 4.321293  | -3.399978 |
| H | 0.756388  | 2.730209  | -4.166328 |

|    |           |           |           |
|----|-----------|-----------|-----------|
| C  | 0.976771  | -1.799058 | -2.823765 |
| C  | -0.125572 | -1.262019 | -3.758385 |
| C  | 1.965872  | -2.702180 | -3.587869 |
| H  | 1.541313  | -0.933825 | -2.463939 |
| H  | -0.801609 | -0.583738 | -3.227202 |
| H  | 0.324494  | -0.713422 | -4.594660 |
| H  | -0.723589 | -2.078449 | -4.180465 |
| H  | 2.770770  | -3.057529 | -2.935360 |
| H  | 1.463185  | -3.579938 | -4.010867 |
| H  | 2.419353  | -2.148120 | -4.417963 |
| C  | -2.498920 | 1.424405  | 2.896134  |
| O  | -2.802819 | 0.789833  | 1.706490  |
| Ag | -1.262961 | 0.897305  | -0.432150 |
| H  | -1.597338 | 1.004043  | 3.388989  |
| H  | -2.303176 | 2.512431  | 2.781093  |
| H  | -3.312416 | 1.343049  | 3.650036  |
| C  | 3.752505  | -1.835452 | 0.123766  |
| C  | 3.468114  | -3.211501 | 0.108490  |
| C  | 5.100433  | -1.425851 | 0.152437  |
| C  | 4.505548  | -4.146164 | 0.122764  |
| H  | 2.446151  | -3.564233 | 0.089362  |
| C  | 6.127427  | -2.363227 | 0.167749  |
| H  | 5.326132  | -0.365624 | 0.161590  |
| C  | 5.835616  | -3.730225 | 0.152260  |
| H  | 4.264052  | -5.205295 | 0.112125  |
| H  | 7.159720  | -2.025171 | 0.189267  |
| H  | 6.638509  | -4.462092 | 0.162703  |
| N  | 3.042538  | 0.489647  | 0.264879  |
| Li | -3.915006 | 1.016172  | 0.374769  |
| O  | -5.561504 | 0.040763  | -0.021511 |
| C  | -5.910334 | -1.193804 | 0.676108  |
| C  | -4.849079 | -2.256618 | 0.366974  |
| C  | -5.899223 | -0.820877 | 2.159471  |
| C  | -7.301891 | -1.634226 | 0.208723  |
| H  | -4.810864 | -2.473431 | -0.708818 |
| H  | -3.860516 | -1.914905 | 0.689042  |
| H  | -5.079832 | -3.194410 | 0.885508  |
| H  | -6.640246 | -0.039720 | 2.363455  |
| H  | -6.143720 | -1.695186 | 2.772749  |
| H  | -4.906919 | -0.450991 | 2.440512  |
| H  | -7.622099 | -2.537804 | 0.739877  |
| H  | -8.036070 | -0.843721 | 0.395307  |
| H  | -7.303645 | -1.859661 | -0.865482 |
| C  | -3.944315 | 1.847188  | -2.207781 |
| C  | -2.984341 | 1.429990  | -1.561147 |
| H  | -5.410002 | -0.149043 | -0.964568 |
| C  | -5.045344 | 2.381407  | -3.017713 |
| H  | -5.997932 | 2.370829  | -2.471835 |
| H  | -4.853969 | 3.421561  | -3.311732 |
| H  | -5.189270 | 1.803585  | -3.940272 |

tBuOH  
 B3LYP SCF energy: -233.67095826 a.u.  
 B3LYP enthalpy: -233.527113 a.u.  
 B3LYP free energy: -233.563784 a.u.  
 B3LYP-D3BJ SCF energy in solution: -233.77603392 a.u.  
 B3LYP-D3BJ enthalpy in solution: -233.632189 a.u.  
 B3LYP-D3BJ free energy in solution: -233.668860 a.u.  
 Three lowest frequencies (cm-1): 200.5105 257.3467 269.3211

Cartesian coordinates

| ATOM | X         | Y         | Z         |
|------|-----------|-----------|-----------|
| C    | 0.687232  | 1.267513  | -0.509555 |
| C    | -0.005452 | -0.000021 | 0.013839  |
| H    | 0.203462  | 2.160169  | -0.099566 |
| H    | 1.744108  | 1.284781  | -0.211371 |
| H    | 0.651626  | 1.323140  | -1.603866 |
| C    | 0.694170  | -1.263471 | -0.510169 |
| C    | -1.490366 | -0.003940 | -0.357394 |
| H    | 0.215546  | -2.158992 | -0.100393 |
| H    | 0.658618  | -1.318903 | -1.604487 |
| H    | 1.751227  | -1.274899 | -0.212302 |
| H    | -1.622251 | -0.003640 | -1.444684 |
| H    | -1.981239 | -0.892009 | 0.054086  |
| H    | -1.986121 | 0.880910  | 0.055169  |
| O    | 0.013422  | -0.000300 | 1.452336  |
| H    | 0.944147  | 0.001355  | 1.728401  |

MeOLi

B3LYP SCF energy: -122.67689540 a.u.  
 B3LYP enthalpy: -122.630229 a.u.  
 B3LYP free energy: -122.659945 a.u.  
 B3LYP-D3BJ SCF energy in solution: -122.73610585 a.u.  
 B3LYP-D3BJ enthalpy in solution: -122.689439 a.u.  
 B3LYP-D3BJ free energy in solution: -122.719155 a.u.  
 Three lowest frequencies (cm-1): 168.0185 168.1543 839.5774

Cartesian coordinates

| ATOM | X         | Y         | Z         |
|------|-----------|-----------|-----------|
| C    | -0.931851 | -0.000042 | 0.000110  |
| H    | -1.358922 | 0.082092  | -1.019170 |
| H    | -1.358517 | 0.841688  | 0.581077  |
| H    | -1.358415 | -0.924008 | 0.438762  |
| O    | 0.443480  | 0.000110  | -0.000296 |
| Li   | 2.039707  | -0.000132 | 0.000346  |

4  
 B3LYP SCF energy: -1668.98901753 a.u.

B3LYP enthalpy: -1668.255839 a.u.  
 B3LYP free energy: -1668.380060 a.u.  
 B3LYP-D3BJ SCF energy in solution: -1670.87723194 a.u.  
 B3LYP-D3BJ enthalpy in solution: -1670.144053 a.u.  
 B3LYP-D3BJ free energy in solution: -1670.268274 a.u.  
 Three lowest frequencies (cm-1): 14.4997 17.1539 17.4755

Cartesian coordinates

| ATOM | X         | Y         | Z         |
|------|-----------|-----------|-----------|
| N    | -1.082086 | 0.039746  | -0.045396 |
| N    | 0.490881  | -1.385061 | -0.008579 |
| C    | 0.285459  | -0.056594 | -0.027279 |
| C    | -1.631076 | -1.243322 | -0.029157 |
| C    | -1.765566 | 1.317191  | -0.048014 |
| C    | -2.156429 | 1.874855  | 1.185479  |
| C    | -1.982469 | 1.963619  | -1.282757 |
| C    | -2.806861 | 3.114586  | 1.152770  |
| C    | -2.635392 | 3.202024  | -1.252130 |
| C    | -3.047001 | 3.771778  | -0.050340 |
| H    | -3.120813 | 3.574663  | 2.084980  |
| H    | -2.815306 | 3.730339  | -2.183794 |
| H    | -3.549225 | 4.735343  | -0.051249 |
| C    | 1.767964  | -2.058288 | -0.001949 |
| C    | 2.322732  | -2.448414 | -1.235262 |
| C    | 2.392933  | -2.305946 | 1.234290  |
| C    | 3.556453  | -3.108927 | -1.202542 |
| C    | 3.627941  | -2.965275 | 1.206077  |
| C    | 4.204413  | -3.363370 | 0.003303  |
| H    | 4.016547  | -3.424855 | -2.134135 |
| H    | 4.143869  | -3.168166 | 2.140050  |
| H    | 5.163890  | -3.873608 | 0.005325  |
| C    | 1.784148  | -1.890591 | 2.568944  |
| C    | 2.679025  | -0.873319 | 3.303600  |
| C    | 1.481626  | -3.117109 | 3.452012  |
| H    | 0.829006  | -1.395204 | 2.369952  |
| H    | 2.862679  | 0.011992  | 2.685354  |
| H    | 2.198212  | -0.548500 | 4.233965  |
| H    | 3.650398  | -1.308662 | 3.565802  |
| H    | 0.810858  | -3.816876 | 2.941514  |
| H    | 2.397303  | -3.659661 | 3.714480  |
| H    | 1.002439  | -2.802849 | 4.386775  |
| C    | -1.884800 | 1.200048  | 2.526661  |
| C    | -3.188511 | 0.911912  | 3.296482  |
| C    | -0.905447 | 2.034388  | 3.376758  |
| H    | -1.403190 | 0.236364  | 2.333910  |
| H    | -3.874981 | 0.296915  | 2.704720  |
| H    | -2.967197 | 0.377231  | 4.227447  |
| H    | -3.710214 | 1.838142  | 3.563846  |
| H    | 0.033208  | 2.213905  | 2.841905  |
| H    | -1.333870 | 3.008963  | 3.638367  |
| H    | -0.674502 | 1.509920  | 4.311533  |
| C    | 1.630152  | -2.191537 | -2.569289 |

|    |           |           |           |
|----|-----------|-----------|-----------|
| C  | 1.157808  | -3.512832 | -3.207557 |
| C  | 2.521057  | -1.384614 | -3.532870 |
| H  | 0.737079  | -1.588180 | -2.379968 |
| H  | 0.478118  | -4.051043 | -2.538386 |
| H  | 0.629356  | -3.315566 | -4.147850 |
| H  | 2.004713  | -4.172293 | -3.431415 |
| H  | 2.836322  | -0.437544 | -3.082067 |
| H  | 3.422471  | -1.940524 | -3.815600 |
| H  | 1.971062  | -1.159377 | -4.454299 |
| C  | -1.532735 | 1.382187  | -2.620348 |
| C  | -0.448390 | 2.264467  | -3.271028 |
| C  | -2.719941 | 1.160539  | -3.578577 |
| H  | -1.082021 | 0.402469  | -2.435048 |
| H  | 0.411741  | 2.392572  | -2.605169 |
| H  | -0.096981 | 1.806040  | -4.202899 |
| H  | -0.836603 | 3.260541  | -3.513797 |
| H  | -3.474023 | 0.497393  | -3.139946 |
| H  | -3.211706 | 2.105265  | -3.837502 |
| H  | -2.370220 | 0.703747  | -4.511579 |
| Ag | 1.735374  | 1.503705  | 0.018951  |
| N  | -0.661544 | -2.129549 | -0.011527 |
| C  | -3.049705 | -1.644860 | 0.000552  |
| C  | -4.116957 | -0.783297 | -0.304194 |
| C  | -3.333472 | -2.982001 | 0.340438  |
| C  | -5.431522 | -1.251751 | -0.265252 |
| H  | -3.933551 | 0.247266  | -0.576989 |
| C  | -4.645945 | -3.440895 | 0.374816  |
| H  | -2.511653 | -3.649040 | 0.575439  |
| C  | -5.702619 | -2.576877 | 0.073858  |
| H  | -6.244232 | -0.572068 | -0.505279 |
| H  | -4.844829 | -4.475080 | 0.641486  |
| H  | -6.727889 | -2.934981 | 0.103899  |
| C  | 3.122711  | 2.998460  | 0.074132  |
| C  | 3.954508  | 3.897614  | 0.103646  |
| C  | 4.948417  | 4.970636  | 0.138266  |
| H  | 5.878287  | 4.649106  | 0.627191  |
| H  | 5.215743  | 5.310288  | -0.871843 |
| H  | 4.581331  | 5.848624  | 0.687443  |

5

|                                     |                    |         |         |
|-------------------------------------|--------------------|---------|---------|
| B3LYP SCF energy:                   | -456.68461216 a.u. |         |         |
| B3LYP enthalpy:                     | -456.365632 a.u.   |         |         |
| B3LYP free energy:                  | -456.419146 a.u.   |         |         |
| B3LYP-D3BJ SCF energy in solution:  | -456.87679839 a.u. |         |         |
| B3LYP-D3BJ enthalpy in solution:    | -456.557818 a.u.   |         |         |
| B3LYP-D3BJ free energy in solution: | -456.611332 a.u.   |         |         |
| Three lowest frequencies (cm-1):    | 18.0080            | 48.7916 | 94.1315 |

Cartesian coordinates

| ATOM | X | Y | Z |
|------|---|---|---|
|------|---|---|---|

|   |           |           |           |
|---|-----------|-----------|-----------|
| C | 2.163177  | -1.508768 | 0.246710  |
| C | 1.102487  | -1.296170 | 1.347094  |
| C | 1.494027  | 1.332332  | -1.200688 |
| C | 0.198424  | -0.039427 | 1.172485  |
| C | 1.981472  | 1.637727  | 0.231847  |
| C | 0.945344  | 1.321228  | 1.331255  |
| H | 2.555174  | -2.531970 | 0.325140  |
| H | 1.597899  | -1.266592 | 2.329085  |
| H | 0.809859  | 2.134909  | -1.515370 |
| H | 2.252271  | 2.700458  | 0.295375  |
| H | 3.021450  | -0.855956 | 0.430198  |
| H | 0.444832  | -2.178091 | 1.372949  |
| H | 2.346692  | 1.380296  | -1.894403 |
| H | -0.566259 | -0.078639 | 1.960189  |
| H | 2.907757  | 1.091390  | 0.431285  |
| H | 0.188369  | 2.120012  | 1.339542  |
| H | 1.433519  | 1.364799  | 2.316271  |
| C | 1.636683  | -1.284160 | -1.186255 |
| H | 1.041953  | -2.161640 | -1.482364 |
| H | 2.485794  | -1.251727 | -1.885191 |
| C | 0.743660  | -0.023520 | -1.374200 |
| H | 0.357136  | -0.048077 | -2.403859 |
| B | -0.404878 | -0.056718 | -0.287929 |
| C | -1.930928 | -0.072821 | -0.684617 |
| H | -2.085171 | -0.981861 | -1.295868 |
| H | -2.094371 | 0.742236  | -1.412623 |
| C | -2.995539 | -0.006811 | 0.421250  |
| C | -4.432098 | -0.032567 | -0.111951 |
| H | -2.847716 | 0.904294  | 1.017845  |
| H | -2.852968 | -0.843946 | 1.118631  |
| H | -5.167009 | 0.014812  | 0.700437  |
| H | -4.620203 | 0.816102  | -0.781840 |
| H | -4.624874 | -0.949479 | -0.683364 |

6-TS

|                                     |                     |         |         |
|-------------------------------------|---------------------|---------|---------|
| B3LYP SCF energy:                   | -2125.65881699 a.u. |         |         |
| B3LYP enthalpy:                     | -2124.605944 a.u.   |         |         |
| B3LYP free energy:                  | -2124.758166 a.u.   |         |         |
| B3LYP-D3BJ SCF energy in solution:  | -2127.75975559 a.u. |         |         |
| B3LYP-D3BJ enthalpy in solution:    | -2126.706883 a.u.   |         |         |
| B3LYP-D3BJ free energy in solution: | -2126.859105 a.u.   |         |         |
| Three lowest frequencies (cm-1):    | -139.9551           | 11.4653 | 14.9406 |
| Imaginary frequency:                | -139.9551 cm-1      |         |         |

Cartesian coordinates

| ATOM | X        | Y         | Z         |
|------|----------|-----------|-----------|
| N    | 2.063197 | 1.375451  | -0.014200 |
| N    | 1.898005 | -0.741716 | -0.021713 |
| C    | 1.147921 | 0.399068  | -0.138448 |
| C    | 3.235038 | -0.389880 | 0.171899  |

|   |           |           |           |
|---|-----------|-----------|-----------|
| C | 1.821207  | 2.798089  | -0.059718 |
| C | 1.887864  | 3.450048  | -1.305326 |
| C | 1.556362  | 3.470987  | 1.148029  |
| C | 1.666153  | 4.832367  | -1.316536 |
| C | 1.343256  | 4.852905  | 1.076336  |
| C | 1.395378  | 5.527185  | -0.140774 |
| H | 1.708790  | 5.370685  | -2.258870 |
| H | 1.135884  | 5.407458  | 1.986534  |
| H | 1.226605  | 6.600232  | -0.172618 |
| C | 1.312043  | -2.066341 | -0.078937 |
| C | 0.936795  | -2.690850 | 1.127724  |
| C | 1.122737  | -2.663882 | -1.342644 |
| C | 0.362955  | -3.965110 | 1.037429  |
| C | 0.543907  | -3.938628 | -1.368546 |
| C | 0.167910  | -4.584336 | -0.193710 |
| H | 0.055858  | -4.474148 | 1.945932  |
| H | 0.379643  | -4.427412 | -2.324257 |
| H | -0.285157 | -5.570731 | -0.238458 |
| C | 1.524314  | -1.992175 | -2.653884 |
| C | 0.299699  | -1.742396 | -3.555942 |
| C | 2.604090  | -2.801381 | -3.400472 |
| H | 1.957968  | -1.014628 | -2.420687 |
| H | -0.457893 | -1.140914 | -3.043277 |
| H | 0.603430  | -1.211492 | -4.465904 |
| H | -0.173104 | -2.683056 | -3.860190 |
| H | 3.501084  | -2.939212 | -2.786937 |
| H | 2.235955  | -3.793154 | -3.687305 |
| H | 2.899326  | -2.279278 | -4.317928 |
| C | 2.209088  | 2.719406  | -2.604670 |
| C | 3.592422  | 3.137489  | -3.141709 |
| C | 1.109237  | 2.919973  | -3.664590 |
| H | 2.256404  | 1.647130  | -2.391289 |
| H | 4.377440  | 2.940940  | -2.403694 |
| H | 3.832259  | 2.579827  | -4.054779 |
| H | 3.618137  | 4.206058  | -3.385631 |
| H | 0.131634  | 2.601492  | -3.286885 |
| H | 1.027020  | 3.969166  | -3.970923 |
| H | 1.338451  | 2.332149  | -4.561229 |
| C | 1.130906  | -2.047450 | 2.498015  |
| C | 2.111440  | -2.859224 | 3.368631  |
| C | -0.213570 | -1.844659 | 3.223885  |
| H | 1.571664  | -1.055884 | 2.352978  |
| H | 3.082306  | -2.979273 | 2.876557  |
| H | 2.274439  | -2.351522 | 4.326363  |
| H | 1.717903  | -3.858898 | 3.586822  |
| H | -0.908684 | -1.247284 | 2.625978  |
| H | -0.700359 | -2.802057 | 3.442103  |
| H | -0.051657 | -1.329911 | 4.178221  |
| C | 1.525743  | 2.762005  | 2.498051  |
| C | 0.210184  | 3.016208  | 3.257124  |
| C | 2.751149  | 3.154543  | 3.347902  |
| H | 1.588288  | 1.683951  | 2.319355  |



|    |           |           |           |
|----|-----------|-----------|-----------|
| H  | -0.657977 | 2.717615  | 2.660244  |
| H  | 0.197001  | 2.440019  | 4.189487  |
| H  | 0.089840  | 4.072835  | 3.522101  |
| H  | 3.684753  | 2.922039  | 2.824398  |
| H  | 2.749818  | 4.227136  | 3.575254  |
| H  | 2.745876  | 2.610377  | 4.299762  |
| C  | -2.965630 | 1.111597  | -0.823004 |
| C  | -3.692793 | 1.952830  | -1.358699 |
| C  | -4.631057 | 2.901840  | -1.949481 |
| H  | -4.460727 | 3.922572  | -1.584208 |
| H  | -4.568785 | 2.916424  | -3.045074 |
| H  | -5.659489 | 2.625004  | -1.681848 |
| C  | -5.655072 | -2.755099 | 0.859946  |
| C  | -4.111059 | -2.745201 | 0.968504  |
| C  | -5.668172 | -0.771167 | -1.682982 |
| C  | -3.381050 | -1.715444 | 0.053578  |
| C  | -4.849986 | -2.020494 | -2.079356 |
| C  | -3.443717 | -2.087368 | -1.446141 |
| H  | -6.070391 | -3.280110 | 1.732539  |
| H  | -3.736792 | -3.762437 | 0.767465  |
| H  | -5.308655 | 0.072325  | -2.285190 |
| H  | -4.749636 | -2.047058 | -3.174559 |
| H  | -5.954413 | -3.355395 | -0.004770 |
| H  | -3.835418 | -2.526221 | 2.009509  |
| H  | -6.718679 | -0.930808 | -1.977261 |
| H  | -2.317203 | -1.744514 | 0.347342  |
| H  | -5.409658 | -2.926361 | -1.822904 |
| H  | -2.789204 | -1.390671 | -1.987600 |
| H  | -3.027606 | -3.094828 | -1.613055 |
| C  | -6.307136 | -1.356477 | 0.757255  |
| H  | -6.342683 | -0.909495 | 1.760443  |
| H  | -7.357138 | -1.481075 | 0.447199  |
| C  | -5.581030 | -0.356903 | -0.193620 |
| H  | -6.118974 | 0.599438  | -0.095097 |
| B  | -4.063826 | -0.280547 | 0.357460  |
| C  | -3.804110 | 0.384867  | 1.811702  |
| H  | -2.721195 | 0.476152  | 2.002729  |
| H  | -4.159644 | -0.341033 | 2.564919  |
| Ag | -0.951120 | 0.670986  | -0.454133 |
| N  | 3.342072  | 0.919864  | 0.173613  |
| C  | 4.407833  | -1.261556 | 0.373560  |
| C  | 4.412908  | -2.645462 | 0.130286  |
| C  | 5.595204  | -0.647987 | 0.819001  |
| C  | 5.576995  | -3.390232 | 0.328810  |
| H  | 3.520786  | -3.149049 | -0.216270 |
| C  | 6.750590  | -1.397261 | 1.013049  |
| H  | 5.595827  | 0.419527  | 1.008062  |
| C  | 6.747302  | -2.773624 | 0.769714  |
| H  | 5.562280  | -4.458748 | 0.133867  |
| H  | 7.655610  | -0.905616 | 1.358509  |
| H  | 7.649579  | -3.358853 | 0.923362  |
| C  | -4.471656 | 1.733436  | 2.122804  |

|   |           |          |          |
|---|-----------|----------|----------|
| C | -4.195915 | 2.249752 | 3.541053 |
| H | -5.558766 | 1.645876 | 1.983482 |
| H | -4.132760 | 2.479502 | 1.392255 |
| H | -4.687078 | 3.213501 | 3.729700 |
| H | -4.554111 | 1.540500 | 4.298941 |
| H | -3.119236 | 2.388355 | 3.708703 |

7

|                                     |                     |         |         |
|-------------------------------------|---------------------|---------|---------|
| B3LYP SCF energy:                   | -2125.67796005 a.u. |         |         |
| B3LYP enthalpy:                     | -2124.624075 a.u.   |         |         |
| B3LYP free energy:                  | -2124.776510 a.u.   |         |         |
| B3LYP-D3BJ SCF energy in solution:  | -2127.78636026 a.u. |         |         |
| B3LYP-D3BJ enthalpy in solution:    | -2126.732475 a.u.   |         |         |
| B3LYP-D3BJ free energy in solution: | -2126.884910 a.u.   |         |         |
| Three lowest frequencies (cm-1):    | 10.8469             | 14.0086 | 16.1779 |

#### Cartesian coordinates

| ATOM | X         | Y         | Z         |
|------|-----------|-----------|-----------|
| N    | -2.273359 | -0.163797 | 0.017123  |
| N    | -1.092531 | 1.600394  | 0.137564  |
| C    | -0.977727 | 0.276938  | -0.054697 |
| C    | -2.626110 | -1.557083 | -0.169043 |
| C    | -2.966832 | -1.996140 | -1.464863 |
| C    | -2.585066 | -2.418952 | 0.946634  |
| C    | -3.278431 | -3.352425 | -1.621168 |
| C    | -2.906020 | -3.764793 | 0.727609  |
| C    | -3.248915 | -4.228945 | -0.539637 |
| H    | -3.545329 | -3.726353 | -2.605156 |
| H    | -2.882950 | -4.458400 | 1.562691  |
| H    | -3.493820 | -5.277590 | -0.684724 |
| C    | -0.023452 | 2.574105  | 0.160595  |
| C    | 0.515752  | 2.942082  | 1.408136  |
| C    | 0.402907  | 3.128598  | -1.061546 |
| C    | 1.534582  | 3.901619  | 1.402153  |
| C    | 1.424443  | 4.083639  | -1.004250 |
| C    | 1.986267  | 4.463813  | 0.211355  |
| H    | 1.983732  | 4.208336  | 2.341073  |
| H    | 1.787533  | 4.532177  | -1.923227 |
| H    | 2.784085  | 5.200907  | 0.230604  |
| C    | -0.240772 | 2.766267  | -2.396389 |
| C    | 0.788378  | 2.536591  | -3.517608 |
| C    | -1.275306 | 3.838492  | -2.799281 |
| H    | -0.782731 | 1.823364  | -2.268112 |
| H    | 1.544022  | 1.799920  | -3.225466 |
| H    | 0.280632  | 2.171745  | -4.418218 |
| H    | 1.308679  | 3.460977  | -3.792597 |
| H    | -2.045031 | 3.955279  | -2.028849 |
| H    | -0.792334 | 4.812256  | -2.943754 |
| H    | -1.767458 | 3.563499  | -3.740065 |
| C    | -3.004104 | -1.068249 | -2.675747 |

|   |           |           |           |
|---|-----------|-----------|-----------|
| C | -4.403755 | -1.028864 | -3.320855 |
| C | -1.925937 | -1.453262 | -3.708342 |
| H | -2.776882 | -0.052025 | -2.339182 |
| H | -5.168866 | -0.732059 | -2.595707 |
| H | -4.418073 | -0.307753 | -4.146045 |
| H | -4.687257 | -2.005283 | -3.730417 |
| H | -0.924728 | -1.429308 | -3.263989 |
| H | -2.094269 | -2.460406 | -4.107083 |
| H | -1.941178 | -0.753496 | -4.551894 |
| C | -0.007619 | 2.376564  | 2.724681  |
| C | -0.993000 | 3.368807  | 3.377845  |
| C | 1.115663  | 1.985187  | 3.701072  |
| H | -0.567611 | 1.461695  | 2.501238  |
| H | -1.827514 | 3.596538  | 2.706761  |
| H | -1.400193 | 2.948813  | 4.305492  |
| H | -0.489454 | 4.310518  | 3.627183  |
| H | 1.827158  | 1.292685  | 3.240576  |
| H | 1.672816  | 2.859303  | 4.056779  |
| H | 0.685468  | 1.496599  | 4.583065  |
| C | -2.217852 | -1.949578 | 2.351814  |
| C | -0.924012 | -2.623873 | 2.849232  |
| C | -3.374919 | -2.172184 | 3.346629  |
| H | -2.027445 | -0.872629 | 2.315032  |
| H | -0.083777 | -2.429539 | 2.174194  |
| H | -0.655303 | -2.241678 | 3.840326  |
| H | -1.043792 | -3.710324 | 2.932435  |
| H | -4.288697 | -1.661445 | 3.023636  |
| H | -3.606271 | -3.237164 | 3.464045  |
| H | -3.100667 | -1.782825 | 4.333587  |
| C | 2.952544  | -1.842398 | -0.625871 |
| C | 2.182230  | -2.609633 | -1.228217 |
| C | 1.623949  | -3.728164 | -2.011893 |
| H | 0.889201  | -4.305496 | -1.438536 |
| H | 1.132288  | -3.383173 | -2.929159 |
| H | 2.430337  | -4.411663 | -2.304403 |
| C | 6.434709  | 0.925755  | 0.473345  |
| C | 4.997924  | 1.492817  | 0.380643  |
| C | 5.822913  | -1.453346 | -1.641976 |
| C | 3.993336  | 0.628161  | -0.419237 |
| C | 5.574440  | -0.109910 | -2.363816 |
| C | 4.277618  | 0.617165  | -1.940876 |
| H | 6.969519  | 1.439638  | 1.286160  |
| H | 5.052456  | 2.511475  | -0.039954 |
| H | 5.185712  | -2.218821 | -2.108890 |
| H | 5.549396  | -0.284453 | -3.450126 |
| H | 6.984876  | 1.185932  | -0.437226 |
| H | 4.603921  | 1.615194  | 1.398748  |
| H | 6.861980  | -1.766389 | -1.840088 |
| H | 3.006398  | 1.113629  | -0.291826 |
| H | 6.430077  | 0.554116  | -2.201385 |
| H | 3.429714  | 0.121122  | -2.438989 |
| H | 4.306987  | 1.644479  | -2.343189 |

|    |           |           |           |
|----|-----------|-----------|-----------|
| C  | 6.521385  | -0.601595 | 0.701137  |
| H  | 6.342861  | -0.806721 | 1.765794  |
| H  | 7.559085  | -0.921225 | 0.506506  |
| C  | 5.527946  | -1.457195 | -0.122744 |
| H  | 5.662520  | -2.497920 | 0.213855  |
| B  | 3.990460  | -0.915151 | 0.184961  |
| C  | 3.548205  | -0.996737 | 1.782751  |
| H  | 4.159915  | -0.303121 | 2.379866  |
| H  | 2.508957  | -0.623798 | 1.896657  |
| Ag | 0.784037  | -0.894523 | -0.435816 |
| C  | -3.111487 | 0.928113  | 0.247913  |
| C  | -4.579772 | 0.961961  | 0.382493  |
| C  | -5.387219 | -0.181997 | 0.501457  |
| C  | -5.194006 | 2.229720  | 0.407405  |
| C  | -6.770578 | -0.055561 | 0.640630  |
| H  | -4.950439 | -1.171224 | 0.491480  |
| C  | -6.572535 | 2.346429  | 0.548108  |
| H  | -4.575697 | 3.115544  | 0.316473  |
| C  | -7.368872 | 1.203602  | 0.664470  |
| H  | -7.378256 | -0.951178 | 0.733011  |
| H  | -7.026916 | 3.332948  | 0.564601  |
| H  | -8.445862 | 1.295654  | 0.772768  |
| N  | -2.384108 | 2.019666  | 0.324286  |
| C  | 3.627055  | -2.380811 | 2.446460  |
| H  | 3.019193  | -3.098772 | 1.875161  |
| H  | 4.659017  | -2.754334 | 2.385793  |
| C  | 3.182495  | -2.403728 | 3.915309  |
| H  | 2.139366  | -2.074104 | 4.019044  |
| H  | 3.258601  | -3.407579 | 4.354775  |
| H  | 3.797600  | -1.727634 | 4.523641  |

#### 8-TS

|                                     |                     |         |         |
|-------------------------------------|---------------------|---------|---------|
| B3LYP SCF energy:                   | -2125.65179906 a.u. |         |         |
| B3LYP enthalpy:                     | -2124.598367 a.u.   |         |         |
| B3LYP free energy:                  | -2124.748416 a.u.   |         |         |
| B3LYP-D3BJ SCF energy in solution:  | -2127.75139373 a.u. |         |         |
| B3LYP-D3BJ enthalpy in solution:    | -2126.697962 a.u.   |         |         |
| B3LYP-D3BJ free energy in solution: | -2126.848011 a.u.   |         |         |
| Three lowest frequencies (cm-1):    | -429.6159           | 10.4376 | 16.7066 |
| Imaginary frequency:                | -429.6159 cm-1      |         |         |

#### Cartesian coordinates

| ATOM | X        | Y         | Z         |
|------|----------|-----------|-----------|
| N    | 2.421323 | 1.236124  | -0.026367 |
| N    | 1.956092 | -0.828904 | 0.113958  |
| C    | 1.365131 | 0.403148  | 0.008542  |
| C    | 2.385488 | 2.676272  | -0.122559 |
| C    | 2.386417 | 3.264204  | -1.401146 |
| C    | 2.375541 | 3.426683  | 1.068355  |
| C    | 2.358087 | 4.662806  | -1.462867 |

|   |           |           |           |
|---|-----------|-----------|-----------|
| C | 2.352283  | 4.821030  | 0.946395  |
| C | 2.339998  | 5.434101  | -0.303947 |
| H | 2.353132  | 5.152929  | -2.432149 |
| H | 2.345089  | 5.434149  | 1.842659  |
| H | 2.319830  | 6.518295  | -0.375182 |
| C | 1.196034  | -2.059892 | 0.174159  |
| C | 0.729633  | -2.502939 | 1.429333  |
| C | 0.951362  | -2.759172 | -1.024380 |
| C | 0.011354  | -3.704786 | 1.457446  |
| C | 0.228152  | -3.954672 | -0.933319 |
| C | -0.232783 | -4.427231 | 0.292274  |
| H | -0.367783 | -4.075652 | 2.404957  |
| H | 0.016920  | -4.518240 | -1.836942 |
| H | -0.793213 | -5.356707 | 0.338819  |
| C | 1.423213  | -2.263349 | -2.387938 |
| C | 0.226044  | -1.862089 | -3.273082 |
| C | 2.320848  | -3.296219 | -3.097294 |
| H | 2.027320  | -1.363267 | -2.236800 |
| H | -0.386261 | -1.094177 | -2.788470 |
| H | 0.579751  | -1.465457 | -4.232188 |
| H | -0.421127 | -2.721148 | -3.483872 |
| H | 3.183280  | -3.568894 | -2.479603 |
| H | 1.771110  | -4.214508 | -3.333911 |
| H | 2.694402  | -2.884052 | -4.041802 |
| C | 2.429881  | 2.445937  | -2.687203 |
| C | 3.726125  | 2.718974  | -3.475119 |
| C | 1.180511  | 2.686764  | -3.556216 |
| H | 2.435217  | 1.385645  | -2.416891 |
| H | 4.610998  | 2.507953  | -2.864889 |
| H | 3.767803  | 2.086894  | -4.369973 |
| H | 3.784388  | 3.763545  | -3.802536 |
| H | 0.264405  | 2.445801  | -3.006021 |
| H | 1.112681  | 3.730474  | -3.884586 |
| H | 1.215593  | 2.057924  | -4.453665 |
| C | 0.975034  | -1.739633 | 2.728654  |
| C | 1.773697  | -2.579900 | 3.745194  |
| C | -0.348338 | -1.240025 | 3.341218  |
| H | 1.577071  | -0.855038 | 2.498758  |
| H | 2.736053  | -2.903645 | 3.333596  |
| H | 1.973663  | -1.989314 | 4.646668  |
| H | 1.219836  | -3.474294 | 4.052805  |
| H | -0.894954 | -0.600147 | 2.640515  |
| H | -1.004333 | -2.074470 | 3.614277  |
| H | -0.148395 | -0.660112 | 4.250042  |
| C | 2.418929  | 2.781150  | 2.449324  |
| C | 1.258898  | 3.250919  | 3.346940  |
| C | 3.785478  | 3.021515  | 3.122078  |
| H | 2.307322  | 1.699849  | 2.323595  |
| H | 0.289223  | 3.054078  | 2.877198  |
| H | 1.287437  | 2.720825  | 4.306157  |
| H | 1.318460  | 4.323777  | 3.563189  |
| H | 4.601557  | 2.632520  | 2.503999  |

|    |           |           |           |
|----|-----------|-----------|-----------|
| H  | 3.965328  | 4.090515  | 3.286920  |
| H  | 3.824258  | 2.520915  | 4.096790  |
| C  | -3.616079 | 0.949055  | -0.219364 |
| C  | -2.661930 | 1.843108  | -0.246159 |
| C  | -2.780532 | 3.349938  | -0.321777 |
| H  | -2.432838 | 3.817590  | 0.609581  |
| H  | -2.145085 | 3.751116  | -1.120858 |
| H  | -3.804021 | 3.702254  | -0.506425 |
| C  | -6.933312 | -2.137081 | -0.336578 |
| C  | -6.476487 | -1.479299 | 0.986020  |
| C  | -3.905795 | -2.186154 | -1.562273 |
| C  | -4.987812 | -1.056619 | 1.042107  |
| C  | -3.932036 | -3.054913 | -0.285668 |
| C  | -3.991184 | -2.249082 | 1.031422  |
| H  | -8.032366 | -2.145232 | -0.368972 |
| H  | -6.715230 | -2.162615 | 1.816958  |
| H  | -2.898633 | -1.756565 | -1.670406 |
| H  | -3.036190 | -3.691391 | -0.270585 |
| H  | -6.640549 | -3.191942 | -0.335320 |
| H  | -7.089548 | -0.581845 | 1.160165  |
| H  | -4.056171 | -2.837955 | -2.438476 |
| H  | -4.830663 | -0.529856 | 1.994371  |
| H  | -4.778839 | -3.747116 | -0.331202 |
| H  | -2.989330 | -1.841587 | 1.231716  |
| H  | -4.210973 | -2.941317 | 1.860905  |
| C  | -6.399745 | -1.457924 | -1.619878 |
| H  | -7.017593 | -0.570631 | -1.827462 |
| H  | -6.571738 | -2.134102 | -2.472804 |
| C  | -4.917746 | -1.009207 | -1.575364 |
| H  | -4.722519 | -0.432462 | -2.492065 |
| B  | -4.598261 | -0.157239 | -0.238262 |
| C  | -5.467180 | 1.558075  | -0.220251 |
| H  | -5.290312 | 2.271536  | -1.030077 |
| H  | -6.346537 | 0.986728  | -0.540920 |
| Ag | -0.706598 | 1.021278  | -0.118896 |
| C  | 3.343953  | -0.673055 | 0.130019  |
| C  | 4.394900  | -1.706603 | 0.187585  |
| C  | 5.707268  | -1.307673 | -0.133659 |
| C  | 4.166653  | -3.043088 | 0.556473  |
| C  | 6.756785  | -2.219062 | -0.086987 |
| H  | 5.888028  | -0.277322 | -0.418618 |
| C  | 5.225580  | -3.951859 | 0.598593  |
| H  | 3.173513  | -3.382309 | 0.817390  |
| C  | 6.520872  | -3.547568 | 0.277726  |
| H  | 7.761317  | -1.892128 | -0.340378 |
| H  | 5.030037  | -4.980560 | 0.887662  |
| H  | 7.340468  | -4.259899 | 0.311016  |
| N  | 3.636719  | 0.604585  | 0.048103  |
| C  | -5.758018 | 2.250058  | 1.111078  |
| C  | -6.968641 | 3.192837  | 1.034828  |
| H  | -4.879066 | 2.814257  | 1.442151  |
| H  | -5.939433 | 1.493807  | 1.884393  |

|   |           |          |          |
|---|-----------|----------|----------|
| H | -7.159579 | 3.677740 | 2.000474 |
| H | -6.810907 | 3.984011 | 0.290614 |
| H | -7.878031 | 2.649451 | 0.748864 |

9-TS

|                                     |                     |        |         |
|-------------------------------------|---------------------|--------|---------|
| B3LYP SCF energy:                   | -2125.64700874 a.u. |        |         |
| B3LYP enthalpy:                     | -2124.593700 a.u.   |        |         |
| B3LYP free energy:                  | -2124.743416 a.u.   |        |         |
| B3LYP-D3BJ SCF energy in solution:  | -2127.74694292 a.u. |        |         |
| B3LYP-D3BJ enthalpy in solution:    | -2126.693634 a.u.   |        |         |
| B3LYP-D3BJ free energy in solution: | -2126.843350 a.u.   |        |         |
| Three lowest frequencies (cm-1):    | -306.2576           | 8.6559 | 14.5736 |
| Imaginary frequency:                | -306.2576 cm-1      |        |         |

Cartesian coordinates

| ATOM | X         | Y         | Z         |
|------|-----------|-----------|-----------|
| N    | 1.747227  | 1.533877  | 0.235936  |
| N    | 2.522233  | -0.422377 | -0.043323 |
| C    | 1.342837  | 0.278925  | -0.027335 |
| C    | 0.925022  | 2.716187  | 0.342094  |
| C    | 0.821239  | 3.554162  | -0.785224 |
| C    | 0.304154  | 3.001123  | 1.572261  |
| C    | 0.050078  | 4.714376  | -0.651432 |
| C    | -0.464719 | 4.169997  | 1.643960  |
| C    | -0.590650 | 5.018005  | 0.547702  |
| H    | -0.052947 | 5.386931  | -1.497397 |
| H    | -0.964993 | 4.420587  | 2.574654  |
| H    | -1.189950 | 5.920863  | 0.627459  |
| C    | 2.576855  | -1.851582 | -0.273681 |
| C    | 2.609023  | -2.713945 | 0.840549  |
| C    | 2.577861  | -2.320755 | -1.604314 |
| C    | 2.660365  | -4.090136 | 0.586394  |
| C    | 2.630309  | -3.707196 | -1.795447 |
| C    | 2.673852  | -4.584220 | -0.714791 |
| H    | 2.683784  | -4.783603 | 1.421647  |
| H    | 2.631248  | -4.103579 | -2.806380 |
| H    | 2.712272  | -5.656254 | -0.887600 |
| C    | 2.521455  | -1.395746 | -2.817707 |
| C    | 1.221971  | -1.607788 | -3.619939 |
| C    | 3.760800  | -1.556119 | -3.720990 |
| H    | 2.514711  | -0.361143 | -2.461086 |
| H    | 0.337588  | -1.455130 | -2.991844 |
| H    | 1.173795  | -0.900968 | -4.456555 |
| H    | 1.168779  | -2.620801 | -4.035549 |
| H    | 4.688735  | -1.362609 | -3.171573 |
| H    | 3.824475  | -2.564916 | -4.144953 |
| H    | 3.710359  | -0.849232 | -4.557013 |
| C    | 1.541592  | 3.256858  | -2.096504 |
| C    | 2.776384  | 4.167852  | -2.253298 |
| C    | 0.610834  | 3.358801  | -3.318545 |

|   |           |           |           |
|---|-----------|-----------|-----------|
| H | 1.903921  | 2.224556  | -2.058536 |
| H | 3.466764  | 4.039028  | -1.413543 |
| H | 3.312688  | 3.930937  | -3.180084 |
| H | 2.483336  | 5.223725  | -2.294633 |
| H | -0.267681 | 2.715073  | -3.205112 |
| H | 0.258358  | 4.383444  | -3.481757 |
| H | 1.147597  | 3.051208  | -4.223528 |
| C | 2.573349  | -2.214312 | 2.281952  |
| C | 3.816399  | -2.663467 | 3.075105  |
| C | 1.273823  | -2.651852 | 2.987448  |
| H | 2.578514  | -1.119995 | 2.267556  |
| H | 4.741282  | -2.337831 | 2.587500  |
| H | 3.793524  | -2.236384 | 4.084312  |
| H | 3.855222  | -3.753958 | 3.179499  |
| H | 0.389059  | -2.299534 | 2.446192  |
| H | 1.208856  | -3.743431 | 3.063667  |
| H | 1.239122  | -2.243747 | 4.004344  |
| C | 0.466001  | 2.122707  | 2.808495  |
| C | -0.887699 | 1.601329  | 3.327013  |
| C | 1.239935  | 2.869898  | 3.913455  |
| H | 1.062503  | 1.248131  | 2.531518  |
| H | -1.416214 | 1.029774  | 2.556339  |
| H | -0.732897 | 0.944107  | 4.190731  |
| H | -1.541571 | 2.420467  | 3.647956  |
| H | 2.217766  | 3.207634  | 3.553000  |
| H | 0.687796  | 3.750244  | 4.262359  |
| H | 1.399924  | 2.212990  | 4.776522  |
| C | -3.684592 | -1.201603 | -0.165993 |
| C | -2.465621 | -1.655391 | -0.233093 |
| C | -2.308969 | -3.178990 | -0.221312 |
| H | -1.801281 | -3.523715 | -1.131558 |
| H | -1.688300 | -3.501295 | 0.624819  |
| H | -3.269228 | -3.707955 | -0.153731 |
| C | -7.840637 | 0.551092  | 0.389409  |
| C | -6.827336 | 0.453773  | 1.553785  |
| C | -6.826729 | -2.216278 | -0.965959 |
| C | -5.785149 | -0.684555 | 1.438072  |
| C | -7.328564 | -2.553183 | 0.457541  |
| C | -6.386195 | -2.106409 | 1.598508  |
| H | -8.337744 | 1.531228  | 0.429148  |
| H | -7.385868 | 0.370459  | 2.500125  |
| H | -6.052840 | -2.946275 | -1.244762 |
| H | -7.485690 | -3.639142 | 0.530121  |
| H | -8.639904 | -0.181421 | 0.541407  |
| H | -6.283953 | 1.408901  | 1.623127  |
| H | -7.656508 | -2.366958 | -1.675593 |
| H | -5.063837 | -0.550968 | 2.259447  |
| H | -8.318715 | -2.110813 | 0.610195  |
| H | -5.544532 | -2.812216 | 1.655395  |
| H | -6.925028 | -2.197444 | 2.555793  |
| C | -7.229929 | 0.354425  | -1.016889 |
| H | -6.725376 | 1.287167  | -1.313178 |



|    |           |           |           |
|----|-----------|-----------|-----------|
| H  | -8.051261 | 0.223781  | -1.739751 |
| C  | -6.208640 | -0.801908 | -1.144128 |
| H  | -5.803313 | -0.769337 | -2.165945 |
| B  | -5.060316 | -0.674481 | -0.012516 |
| C  | -3.963154 | 0.814662  | -0.277225 |
| H  | -3.156993 | 0.979532  | 0.442204  |
| H  | -4.806520 | 1.428144  | 0.064824  |
| Ag | -0.636660 | -0.579832 | -0.211156 |
| C  | 3.578592  | 0.450264  | 0.219580  |
| N  | 3.105720  | 1.663136  | 0.389095  |
| C  | 5.016796  | 0.151708  | 0.346528  |
| C  | 5.624643  | -1.008319 | -0.162097 |
| C  | 5.818455  | 1.107639  | 0.999946  |
| C  | 6.998975  | -1.203372 | -0.015196 |
| H  | 5.038691  | -1.758254 | -0.676779 |
| C  | 7.187728  | 0.906535  | 1.139926  |
| H  | 5.351714  | 2.003730  | 1.393501  |
| C  | 7.784644  | -0.251779 | 0.634667  |
| H  | 7.453118  | -2.105053 | -0.416080 |
| H  | 7.789564  | 1.653883  | 1.649172  |
| H  | 8.853524  | -0.410023 | 0.747227  |
| C  | -3.571197 | 1.227553  | -1.692246 |
| C  | -3.306624 | 2.735114  | -1.821437 |
| H  | -4.366532 | 0.942555  | -2.391853 |
| H  | -2.676151 | 0.672624  | -2.001512 |
| H  | -3.019198 | 3.001935  | -2.847013 |
| H  | -4.200496 | 3.318950  | -1.566887 |
| H  | -2.500103 | 3.059015  | -1.152665 |

10

B3LYP SCF energy: -2125.68991712 a.u.  
 B3LYP enthalpy: -2124.634037 a.u.  
 B3LYP free energy: -2124.785017 a.u.  
 B3LYP-D3BJ SCF energy in solution: -2127.78975042 a.u.  
 B3LYP-D3BJ enthalpy in solution: -2126.733870 a.u.  
 B3LYP-D3BJ free energy in solution: -2126.884850 a.u.  
 Three lowest frequencies (cm-1): 8.0900 15.3136 19.1784

#### Cartesian coordinates

| ATOM | X        | Y         | Z         |
|------|----------|-----------|-----------|
| N    | 2.064959 | 1.431002  | -0.261914 |
| N    | 1.988170 | -0.634718 | 0.211196  |
| C    | 1.178285 | 0.453653  | 0.006684  |
| C    | 1.768140 | 2.818014  | -0.532134 |
| C    | 1.486687 | 3.203109  | -1.856164 |
| C    | 1.799957 | 3.727383  | 0.541946  |
| C    | 1.214772 | 4.557676  | -2.084566 |
| C    | 1.522371 | 5.068950  | 0.254856  |
| C    | 1.230077 | 5.481132  | -1.042800 |
| H    | 0.990165 | 4.892457  | -3.092968 |

|   |           |           |           |
|---|-----------|-----------|-----------|
| H | 1.535404  | 5.799398  | 1.058454  |
| H | 1.015970  | 6.527478  | -1.243518 |
| C | 1.483672  | -1.960197 | 0.501744  |
| C | 1.121275  | -2.269352 | 1.829732  |
| C | 1.381735  | -2.888932 | -0.553568 |
| C | 0.655651  | -3.566193 | 2.082008  |
| C | 0.915477  | -4.171235 | -0.238424 |
| C | 0.558725  | -4.510192 | 1.063453  |
| H | 0.363826  | -3.838040 | 3.092157  |
| H | 0.824366  | -4.911365 | -1.027648 |
| H | 0.195753  | -5.510326 | 1.283741  |
| C | 1.737323  | -2.552747 | -1.999541 |
| C | 0.484933  | -2.581361 | -2.898788 |
| C | 2.836769  | -3.480907 | -2.552726 |
| H | 2.130379  | -1.531928 | -2.029898 |
| H | -0.285150 | -1.894729 | -2.533173 |
| H | 0.747938  | -2.290858 | -3.922866 |
| H | 0.045905  | -3.584987 | -2.939265 |
| H | 3.737139  | -3.453207 | -1.930382 |
| H | 2.495101  | -4.521120 | -2.606427 |
| H | 3.113025  | -3.172817 | -3.567763 |
| C | 1.490234  | 2.220701  | -3.022219 |
| C | 2.650896  | 2.521437  | -3.991503 |
| C | 0.135801  | 2.195766  | -3.756033 |
| H | 1.655590  | 1.216058  | -2.621691 |
| H | 3.616347  | 2.487400  | -3.474807 |
| H | 2.670216  | 1.785314  | -4.803940 |
| H | 2.546256  | 3.514780  | -4.443462 |
| H | -0.681855 | 1.955504  | -3.067974 |
| H | -0.089274 | 3.160755  | -4.224891 |
| H | 0.150214  | 1.438453  | -4.548669 |
| C | 1.221594  | -1.270098 | 2.980438  |
| C | 2.183198  | -1.760983 | 4.081431  |
| C | -0.168087 | -0.946810 | 3.564180  |
| H | 1.630554  | -0.334271 | 2.587893  |
| H | 3.187833  | -1.949365 | 3.686547  |
| H | 2.268005  | -1.005729 | 4.871258  |
| H | 1.825372  | -2.686690 | 4.546590  |
| H | -0.836644 | -0.542417 | 2.796384  |
| H | -0.641394 | -1.839118 | 3.990268  |
| H | -0.077939 | -0.201994 | 4.363679  |
| C | 2.137923  | 3.305805  | 1.967905  |
| C | 1.014662  | 3.671024  | 2.956513  |
| C | 3.492514  | 3.894444  | 2.410100  |
| H | 2.240332  | 2.216522  | 1.986612  |
| H | 0.060966  | 3.226622  | 2.652249  |
| H | 1.260841  | 3.303261  | 3.959735  |
| H | 0.873495  | 4.755551  | 3.028463  |
| H | 4.295541  | 3.583631  | 1.733495  |
| H | 3.465919  | 4.990495  | 2.423495  |
| H | 3.744319  | 3.553667  | 3.421379  |
| C | -4.168222 | 0.901513  | 0.067669  |

|    |           |           |           |
|----|-----------|-----------|-----------|
| C  | -2.969831 | 1.533830  | 0.285438  |
| C  | -2.912479 | 2.977112  | 0.770382  |
| H  | -2.453506 | 3.016168  | 1.769270  |
| H  | -2.255365 | 3.572602  | 0.121650  |
| H  | -3.876635 | 3.498887  | 0.835288  |
| C  | -5.097198 | -2.512807 | -2.458007 |
| C  | -6.124354 | -1.855318 | -1.512802 |
| C  | -2.837609 | -2.737745 | -0.130955 |
| C  | -5.584690 | -1.479533 | -0.101257 |
| C  | -4.058040 | -3.559847 | 0.332718  |
| C  | -5.246884 | -2.698088 | 0.802534  |
| H  | -5.486506 | -2.485352 | -3.485727 |
| H  | -7.004365 | -2.511269 | -1.420487 |
| H  | -2.303818 | -2.374957 | 0.759821  |
| H  | -3.751097 | -4.225186 | 1.152632  |
| H  | -4.997868 | -3.575081 | -2.214267 |
| H  | -6.489458 | -0.930834 | -1.985440 |
| H  | -2.131249 | -3.403995 | -0.650095 |
| H  | -6.393196 | -0.934201 | 0.403360  |
| H  | -4.383034 | -4.226189 | -0.472940 |
| H  | -5.021847 | -2.312510 | 1.808824  |
| H  | -6.133975 | -3.340112 | 0.920986  |
| C  | -3.707364 | -1.843372 | -2.429235 |
| H  | -3.759357 | -0.904500 | -3.001263 |
| H  | -2.988818 | -2.482904 | -2.966278 |
| C  | -3.160639 | -1.501197 | -1.011068 |
| H  | -2.215215 | -0.959994 | -1.168280 |
| B  | -4.263378 | -0.600662 | -0.303005 |
| C  | -5.504376 | 1.637753  | 0.275356  |
| H  | -5.446059 | 2.667677  | -0.102333 |
| H  | -6.288982 | 1.157352  | -0.325048 |
| Ag | -0.976419 | 0.796135  | 0.107689  |
| C  | 3.321980  | -0.251937 | 0.053407  |
| C  | 4.538283  | -1.080108 | 0.145324  |
| C  | 5.700666  | -0.593042 | -0.482625 |
| C  | 4.604468  | -2.297454 | 0.843458  |
| C  | 6.893883  | -1.305145 | -0.413389 |
| H  | 5.651622  | 0.347080  | -1.020868 |
| C  | 5.805082  | -3.006474 | 0.906717  |
| H  | 3.730391  | -2.694845 | 1.342238  |
| C  | 6.951272  | -2.516904 | 0.280460  |
| H  | 7.780020  | -0.915282 | -0.906267 |
| H  | 5.839649  | -3.944886 | 1.452841  |
| H  | 7.882406  | -3.074296 | 0.331648  |
| N  | 3.376466  | 1.026665  | -0.237458 |
| C  | -5.983826 | 1.678893  | 1.739420  |
| C  | -7.334881 | 2.382037  | 1.914239  |
| H  | -5.224313 | 2.180071  | 2.353798  |
| H  | -6.051289 | 0.652148  | 2.124166  |
| H  | -7.652542 | 2.393230  | 2.964220  |
| H  | -7.287412 | 3.423200  | 1.570070  |
| H  | -8.120216 | 1.880382  | 1.334431  |

11

B3LYP SCF energy: -2125.68957019 a.u.  
B3LYP enthalpy: -2124.633531 a.u.  
B3LYP free energy: -2124.783419 a.u.  
B3LYP-D3BJ SCF energy in solution: -2127.78565219 a.u.  
B3LYP-D3BJ enthalpy in solution: -2126.729613 a.u.  
B3LYP-D3BJ free energy in solution: -2126.879501 a.u.  
Three lowest frequencies (cm-1): 14.0306 15.4348 18.0088

Cartesian coordinates

| ATOM | X         | Y         | Z         |
|------|-----------|-----------|-----------|
| N    | 2.280902  | 1.483923  | 0.006243  |
| N    | 2.314270  | -0.627171 | -0.195941 |
| C    | 1.453490  | 0.423223  | -0.005585 |
| C    | 1.905645  | 2.868411  | 0.168776  |
| C    | 1.636950  | 3.630666  | -0.983361 |
| C    | 1.844858  | 3.398285  | 1.471192  |
| C    | 1.283027  | 4.972303  | -0.796057 |
| C    | 1.483497  | 4.744970  | 1.598893  |
| C    | 1.203976  | 5.524386  | 0.479668  |
| H    | 1.065968  | 5.591715  | -1.661390 |
| H    | 1.420860  | 5.187967  | 2.588646  |
| H    | 0.924857  | 6.567487  | 0.602101  |
| C    | 1.864382  | -2.003569 | -0.232320 |
| C    | 1.917041  | -2.758520 | 0.956785  |
| C    | 1.370128  | -2.523344 | -1.446839 |
| C    | 1.464130  | -4.082472 | 0.898789  |
| C    | 0.933222  | -3.854149 | -1.443734 |
| C    | 0.979013  | -4.627372 | -0.286924 |
| H    | 1.486495  | -4.691504 | 1.797442  |
| H    | 0.544868  | -4.287096 | -2.360793 |
| H    | 0.630135  | -5.656160 | -0.308340 |
| C    | 1.297179  | -1.710808 | -2.737613 |
| C    | -0.157200 | -1.561848 | -3.226525 |
| C    | 2.191353  | -2.312371 | -3.840746 |
| H    | 1.671750  | -0.703885 | -2.530063 |
| H    | -0.789622 | -1.100461 | -2.460532 |
| H    | -0.190099 | -0.931334 | -4.122848 |
| H    | -0.594521 | -2.532877 | -3.486735 |
| H    | 3.238679  | -2.373943 | -3.524888 |
| H    | 1.863526  | -3.320875 | -4.118358 |
| H    | 2.147142  | -1.690098 | -4.742011 |
| C    | 1.729800  | 3.057419  | -2.393281 |
| C    | 2.869368  | 3.724441  | -3.188642 |
| C    | 0.385721  | 3.160277  | -3.139335 |
| H    | 1.973777  | 1.993711  | -2.314210 |
| H    | 3.830587  | 3.601068  | -2.678337 |
| H    | 2.950402  | 3.276371  | -4.186029 |
| H    | 2.691297  | 4.798372  | -3.319027 |

|   |           |           |           |
|---|-----------|-----------|-----------|
| H | -0.413579 | 2.656916  | -2.584628 |
| H | 0.086252  | 4.203739  | -3.291091 |
| H | 0.464795  | 2.691924  | -4.127613 |
| C | 2.422538  | -2.190498 | 2.279885  |
| C | 3.596869  | -3.011612 | 2.847568  |
| C | 1.277208  | -2.073594 | 3.305224  |
| H | 2.797144  | -1.178461 | 2.098644  |
| H | 4.420599  | -3.080842 | 2.129297  |
| H | 3.978826  | -2.540517 | 3.760632  |
| H | 3.288705  | -4.030885 | 3.107627  |
| H | 0.458616  | -1.457740 | 2.918429  |
| H | 0.864866  | -3.057466 | 3.556455  |
| H | 1.643541  | -1.617279 | 4.232572  |
| C | 2.159908  | 2.574467  | 2.715021  |
| C | 0.944479  | 2.484590  | 3.657812  |
| C | 3.401019  | 3.122902  | 3.446289  |
| H | 2.398503  | 1.554614  | 2.398563  |
| H | 0.075874  | 2.059750  | 3.143132  |
| H | 1.178112  | 1.846996  | 4.518681  |
| H | 0.659374  | 3.470629  | 4.042724  |
| H | 4.271550  | 3.148505  | 2.781840  |
| H | 3.231366  | 4.140229  | 3.817916  |
| H | 3.645837  | 2.490738  | 4.308096  |
| C | -3.742855 | -0.295187 | 0.244712  |
| C | -2.834695 | 0.711313  | 0.081609  |
| C | -3.253870 | 2.152414  | -0.142862 |
| H | -2.811277 | 2.789554  | 0.635831  |
| H | -2.861114 | 2.536440  | -1.096266 |
| H | -4.336432 | 2.328111  | -0.122346 |
| C | -7.483711 | -1.498414 | -1.557136 |
| C | -6.534142 | -0.442201 | -2.155972 |
| C | -7.409804 | -0.089187 | 1.403568  |
| C | -6.001422 | 0.627272  | -1.151823 |
| C | -8.085205 | 0.879591  | 0.411710  |
| C | -7.105000 | 1.553490  | -0.572738 |
| H | -7.618510 | -2.312154 | -2.283869 |
| H | -7.035326 | 0.059397  | -2.998393 |
| H | -6.889631 | 0.502450  | 2.172567  |
| H | -8.615888 | 1.657950  | 0.978045  |
| H | -8.478260 | -1.062392 | -1.422315 |
| H | -5.663529 | -0.957492 | -2.589891 |
| H | -8.187411 | -0.655975 | 1.938858  |
| H | -5.308956 | 1.256880  | -1.723410 |
| H | -8.862058 | 0.346766  | -0.145162 |
| H | -6.603715 | 2.380613  | -0.047961 |
| H | -7.676600 | 2.023242  | -1.388616 |
| C | -6.985884 | -2.092861 | -0.222944 |
| H | -6.210354 | -2.840860 | -0.445906 |
| H | -7.806303 | -2.648409 | 0.258234  |
| C | -6.373717 | -1.067895 | 0.777767  |
| H | -5.951764 | -1.652995 | 1.605764  |
| B | -5.281137 | -0.192809 | 0.010383  |

|    |           |           |           |
|----|-----------|-----------|-----------|
| C  | -3.235292 | -1.681627 | 0.669836  |
| H  | -2.273268 | -1.881132 | 0.173692  |
| H  | -3.921320 | -2.474069 | 0.334382  |
| Ag | -0.721449 | 0.483902  | 0.130150  |
| C  | 3.620413  | -0.140883 | -0.284314 |
| N  | 3.605816  | 1.166558  | -0.163357 |
| C  | 4.878573  | -0.891182 | -0.451923 |
| C  | 4.945829  | -2.215606 | -0.915613 |
| C  | 6.077471  | -0.217452 | -0.148176 |
| C  | 6.182275  | -2.845644 | -1.067384 |
| H  | 4.044328  | -2.758968 | -1.165716 |
| C  | 7.305476  | -0.851790 | -0.304244 |
| H  | 6.028971  | 0.805330  | 0.208579  |
| C  | 7.364090  | -2.170597 | -0.763324 |
| H  | 6.215317  | -3.869353 | -1.429278 |
| H  | 8.219323  | -0.316164 | -0.062991 |
| H  | 8.323403  | -2.666390 | -0.882432 |
| C  | -3.034031 | -1.833979 | 2.189056  |
| C  | -2.592454 | -3.242896 | 2.601426  |
| H  | -3.964501 | -1.572648 | 2.710687  |
| H  | -2.287715 | -1.095316 | 2.512170  |
| H  | -2.436824 | -3.317473 | 3.685041  |
| H  | -3.345293 | -3.991428 | 2.322588  |
| H  | -1.652783 | -3.522500 | 2.107585  |

MeOH

|                                     |                              |
|-------------------------------------|------------------------------|
| B3LYP SCF energy:                   | -115.71440514 a.u.           |
| B3LYP enthalpy:                     | -115.658697 a.u.             |
| B3LYP free energy:                  | -115.685652 a.u.             |
| B3LYP-D3BJ SCF energy in solution:  | -115.77059205 a.u.           |
| B3LYP-D3BJ enthalpy in solution:    | -115.714884 a.u.             |
| B3LYP-D3BJ free energy in solution: | -115.741839 a.u.             |
| Three lowest frequencies (cm-1):    | 346.1003 1066.7924 1096.5590 |

Cartesian coordinates

| ATOM | X         | Y         | Z         |
|------|-----------|-----------|-----------|
| C    | 0.662324  | -0.019545 | 0.000001  |
| H    | 1.079718  | 0.991032  | -0.000620 |
| H    | 1.036909  | -0.544181 | -0.892857 |
| H    | 1.037007  | -0.543133 | 0.893439  |
| O    | -0.749168 | 0.122497  | 0.000003  |
| H    | -1.134236 | -0.766420 | 0.000010  |

12-TS

|                                    |                     |
|------------------------------------|---------------------|
| B3LYP SCF energy:                  | -2241.39949946 a.u. |
| B3LYP enthalpy:                    | -2240.290655 a.u.   |
| B3LYP free energy:                 | -2240.445950 a.u.   |
| B3LYP-D3BJ SCF energy in solution: | -2243.56022034 a.u. |

B3LYP-D3BJ enthalpy in solution: -2242.451376 a.u.  
 B3LYP-D3BJ free energy in solution: -2242.606671 a.u.  
 Three lowest frequencies (cm-1): -1085.2019 9.1517 14.0261  
 Imaginary frequency: -1085.2019 cm-1

Cartesian coordinates

| ATOM | X         | Y         | Z         |
|------|-----------|-----------|-----------|
| N    | 2.246009  | 1.462731  | -0.114302 |
| N    | 2.154281  | -0.651494 | 0.060621  |
| C    | 1.359408  | 0.464328  | 0.051085  |
| C    | 1.954146  | 2.875087  | -0.182214 |
| C    | 1.620940  | 3.434400  | -1.430113 |
| C    | 2.042084  | 3.632944  | 1.001156  |
| C    | 1.352246  | 4.808516  | -1.464227 |
| C    | 1.769960  | 5.002638  | 0.905941  |
| C    | 1.425111  | 5.585068  | -0.311196 |
| H    | 1.085849  | 5.274945  | -2.408184 |
| H    | 1.829398  | 5.620861  | 1.796694  |
| H    | 1.214792  | 6.650028  | -0.361336 |
| C    | 1.642370  | -2.003192 | 0.169188  |
| C    | 1.338462  | -2.515021 | 1.448478  |
| C    | 1.484270  | -2.756396 | -1.011941 |
| C    | 0.905700  | -3.845197 | 1.519768  |
| C    | 1.044079  | -4.078611 | -0.876581 |
| C    | 0.766844  | -4.622901 | 0.373651  |
| H    | 0.666407  | -4.273587 | 2.488354  |
| H    | 0.909292  | -4.686908 | -1.765960 |
| H    | 0.425534  | -5.651127 | 0.454037  |
| C    | 1.746147  | -2.192132 | -2.405740 |
| C    | 0.441229  | -2.122476 | -3.224789 |
| C    | 2.830393  | -2.989830 | -3.156451 |
| H    | 2.113629  | -1.166371 | -2.300908 |
| H    | -0.325516 | -1.537710 | -2.706829 |
| H    | 0.631468  | -1.658341 | -4.199812 |
| H    | 0.029841  | -3.122072 | -3.405977 |
| H    | 3.766736  | -3.026040 | -2.590210 |
| H    | 2.510407  | -4.020926 | -3.345980 |
| H    | 3.035699  | -2.524874 | -4.127699 |
| C    | 1.562727  | 2.616203  | -2.715762 |
| C    | 2.652003  | 3.068182  | -3.708707 |
| C    | 0.163026  | 2.660128  | -3.358253 |
| H    | 1.769816  | 1.571321  | -2.465533 |
| H    | 3.649287  | 2.996368  | -3.261048 |
| H    | 2.632739  | 2.439206  | -4.606508 |
| H    | 2.499935  | 4.106369  | -4.026292 |
| H    | -0.604227 | 2.299534  | -2.664378 |
| H    | -0.109338 | 3.677251  | -3.662937 |
| H    | 0.137412  | 2.027578  | -4.253237 |
| C    | 1.460623  | -1.697120 | 2.732154  |
| C    | 2.585461  | -2.229706 | 3.642911  |
| C    | 0.119573  | -1.640458 | 3.491912  |
| H    | 1.719698  | -0.669394 | 2.460965  |

|   |           |           |           |
|---|-----------|-----------|-----------|
| H | 3.558953  | -2.210448 | 3.140448  |
| H | 2.661848  | -1.616460 | 4.548367  |
| H | 2.389136  | -3.261958 | 3.955823  |
| H | -0.697523 | -1.297108 | 2.849059  |
| H | -0.159282 | -2.624627 | 3.886459  |
| H | 0.202816  | -0.955967 | 4.344475  |
| C | 2.445993  | 3.023296  | 2.339301  |
| C | 1.432065  | 3.340856  | 3.454158  |
| C | 3.870666  | 3.464654  | 2.731341  |
| H | 2.465446  | 1.934883  | 2.225985  |
| H | 0.424216  | 3.010159  | 3.180496  |
| H | 1.720292  | 2.829912  | 4.380297  |
| H | 1.386982  | 4.413890  | 3.672512  |
| H | 4.595032  | 3.180426  | 1.960970  |
| H | 3.926232  | 4.551524  | 2.865258  |
| H | 4.170189  | 2.994037  | 3.675290  |
| C | -3.885099 | 0.916399  | -0.067864 |
| C | -2.802497 | 1.540284  | 0.488926  |
| C | -2.665868 | 3.061463  | 0.562450  |
| H | -2.181077 | 3.485292  | -0.331089 |
| H | -3.633170 | 3.572136  | 0.670229  |
| H | -2.049179 | 3.364425  | 1.417314  |
| C | -5.162571 | -2.042555 | -2.193914 |
| C | -6.063458 | -1.533636 | -1.039794 |
| C | -2.877817 | -3.063733 | -0.139181 |
| C | -5.403983 | -1.484677 | 0.367043  |
| C | -4.187841 | -3.795714 | 0.216576  |
| C | -5.212097 | -2.910285 | 0.954269  |
| H | -5.591593 | -1.712764 | -3.151334 |
| H | -6.969878 | -2.159942 | -1.007450 |
| H | -2.272138 | -2.978523 | 0.773061  |
| H | -3.953840 | -4.670506 | 0.841696  |
| H | -5.200049 | -3.136178 | -2.227893 |
| H | -6.417184 | -0.527056 | -1.290256 |
| H | -2.296627 | -3.694144 | -0.832648 |
| H | -6.128022 | -0.977076 | 1.025347  |
| H | -4.642631 | -4.206179 | -0.690708 |
| H | -4.890396 | -2.827356 | 2.001266  |
| H | -6.179369 | -3.437863 | 0.984380  |
| C | -3.683872 | -1.591161 | -2.123764 |
| H | -3.612750 | -0.555235 | -2.486639 |
| H | -3.101854 | -2.200360 | -2.835087 |
| C | -3.054743 | -1.637951 | -0.709668 |
| H | -2.036929 | -1.212522 | -0.806504 |
| B | -3.972589 | -0.702575 | 0.260791  |
| C | -4.958174 | 1.723000  | -0.787085 |
| H | -5.312065 | 1.166556  | -1.664536 |
| H | -4.541552 | 2.661722  | -1.178073 |
| O | -3.195825 | -0.657632 | 1.732739  |
| H | -2.690716 | 0.371541  | 1.451533  |
| C | -3.979601 | -0.359730 | 2.890330  |
| H | -4.574346 | 0.550146  | 2.736290  |



|    |           |           |           |
|----|-----------|-----------|-----------|
| H  | -4.648758 | -1.192269 | 3.110374  |
| H  | -3.303053 | -0.209350 | 3.739536  |
| Ag | -0.759512 | 0.765776  | 0.294387  |
| C  | 3.485890  | -0.262695 | -0.103175 |
| C  | 4.691744  | -1.106486 | -0.195628 |
| C  | 5.829144  | -0.540292 | -0.802825 |
| C  | 4.772368  | -2.415845 | 0.307379  |
| C  | 7.012130  | -1.265317 | -0.903972 |
| H  | 5.769094  | 0.470282  | -1.191311 |
| C  | 5.962514  | -3.136951 | 0.199972  |
| H  | 3.917837  | -2.876017 | 0.785244  |
| C  | 7.083645  | -2.568697 | -0.404689 |
| H  | 7.878712  | -0.813562 | -1.378393 |
| H  | 6.008539  | -4.147575 | 0.595519  |
| H  | 8.006488  | -3.135998 | -0.487244 |
| N  | 3.549076  | 1.044447  | -0.208847 |
| C  | -6.182631 | 2.069219  | 0.088012  |
| C  | -7.244707 | 2.874653  | -0.669219 |
| H  | -5.846718 | 2.636962  | 0.966445  |
| H  | -6.629134 | 1.145438  | 0.473919  |
| H  | -8.101123 | 3.114926  | -0.027462 |
| H  | -6.833583 | 3.820361  | -1.045023 |
| H  | -7.623103 | 2.313676  | -1.532998 |

12a-TS

|                                     |                     |        |         |
|-------------------------------------|---------------------|--------|---------|
| B3LYP SCF energy:                   | -2241.37752345 a.u. |        |         |
| B3LYP enthalpy:                     | -2240.269732 a.u.   |        |         |
| B3LYP free energy:                  | -2240.424941 a.u.   |        |         |
| B3LYP-D3BJ SCF energy in solution:  | -2243.53532063 a.u. |        |         |
| B3LYP-D3BJ enthalpy in solution:    | -2242.427529 a.u.   |        |         |
| B3LYP-D3BJ free energy in solution: | -2242.582738 a.u.   |        |         |
| Three lowest frequencies (cm-1):    | -1250.2534          | 8.6580 | 15.6045 |
| Imaginary frequency:                | -1250.2534 cm-1     |        |         |

Cartesian coordinates

| ATOM | X         | Y         | Z         |
|------|-----------|-----------|-----------|
| N    | -1.557707 | 1.566309  | 0.302012  |
| N    | -2.523446 | -0.282369 | -0.090524 |
| C    | -1.276815 | 0.286377  | 0.001379  |
| C    | -0.628986 | 2.653614  | 0.509105  |
| C    | -0.072032 | 2.831391  | 1.789446  |
| C    | -0.373560 | 3.521755  | -0.569192 |
| C    | 0.768247  | 3.936676  | 1.971497  |
| C    | 0.473340  | 4.609586  | -0.328354 |
| C    | 1.036581  | 4.817438  | 0.927660  |
| H    | 1.218246  | 4.108565  | 2.944388  |
| H    | 0.694961  | 5.302146  | -1.134814 |
| H    | 1.692872  | 5.667666  | 1.092173  |
| C    | -2.713357 | -1.688136 | -0.381835 |
| C    | -2.738232 | -2.100769 | -1.730237 |

|   |           |           |           |
|---|-----------|-----------|-----------|
| C | -2.841686 | -2.588354 | 0.695067  |
| C | -2.910104 | -3.468187 | -1.979928 |
| C | -3.009610 | -3.943342 | 0.383685  |
| C | -3.045631 | -4.381204 | -0.937322 |
| H | -2.932551 | -3.821812 | -3.006535 |
| H | -3.107821 | -4.664989 | 1.189281  |
| H | -3.176025 | -5.437727 | -1.155317 |
| C | -2.791084 | -2.149894 | 2.155686  |
| C | -1.533339 | -2.703320 | 2.855089  |
| C | -4.072325 | -2.541583 | 2.917688  |
| H | -2.721216 | -1.058258 | 2.184913  |
| H | -0.621521 | -2.386877 | 2.336868  |
| H | -1.484385 | -2.342533 | 3.889239  |
| H | -1.542603 | -3.799255 | 2.883176  |
| H | -4.965744 | -2.131645 | 2.434648  |
| H | -4.190224 | -3.629756 | 2.978439  |
| H | -4.032270 | -2.156830 | 3.943238  |
| C | -0.378464 | 1.903545  | 2.959901  |
| C | -1.357084 | 2.575158  | 3.944980  |
| C | 0.898900  | 1.422830  | 3.673674  |
| H | -0.874653 | 1.011357  | 2.565658  |
| H | -2.289010 | 2.861635  | 3.445197  |
| H | -1.603051 | 1.891138  | 4.766176  |
| H | -0.918041 | 3.479819  | 4.382387  |
| H | 1.606173  | 0.975046  | 2.967860  |
| H | 1.408678  | 2.244958  | 4.189910  |
| H | 0.640094  | 0.674254  | 4.432308  |
| C | -2.587476 | -1.133033 | -2.901637 |
| C | -3.825184 | -1.150727 | -3.820502 |
| C | -1.299549 | -1.418015 | -3.699551 |
| H | -2.498714 | -0.119354 | -2.499307 |
| H | -4.739298 | -0.903140 | -3.269686 |
| H | -3.706266 | -0.416606 | -4.625580 |
| H | -3.967725 | -2.132453 | -4.286622 |
| H | -0.413937 | -1.357067 | -3.057601 |
| H | -1.321363 | -2.416300 | -4.152238 |
| H | -1.186416 | -0.686981 | -4.508601 |
| C | -1.000974 | 3.330090  | -1.945929 |
| C | 0.053807  | 3.309477  | -3.068155 |
| C | -2.080549 | 4.399028  | -2.208911 |
| H | -1.500089 | 2.355883  | -1.959743 |
| H | 0.816668  | 2.545594  | -2.885015 |
| H | -0.426054 | 3.092524  | -4.029926 |
| H | 0.562884  | 4.274904  | -3.167490 |
| H | -2.858998 | 4.367551  | -1.439554 |
| H | -1.646646 | 5.405996  | -2.212042 |
| H | -2.553034 | 4.234354  | -3.184756 |
| C | 3.609783  | -1.780479 | -0.056717 |
| C | 2.293039  | -2.085248 | -0.335950 |
| C | 1.855233  | -3.502567 | -0.659542 |
| H | 1.248237  | -3.499535 | -1.574824 |
| H | 2.660952  | -4.236348 | -0.791980 |

|    |           |           |           |
|----|-----------|-----------|-----------|
| H  | 1.187408  | -3.876646 | 0.130087  |
| C  | 5.214626  | 0.521693  | -2.768220 |
| C  | 6.059766  | -0.265666 | -1.742210 |
| C  | 3.840655  | 2.366982  | -0.458165 |
| C  | 5.770113  | 0.063944  | -0.250050 |
| C  | 5.356998  | 2.644510  | -0.464463 |
| C  | 6.203678  | 1.503672  | 0.139609  |
| H  | 5.309651  | 0.038471  | -3.751434 |
| H  | 7.126491  | -0.103406 | -1.964280 |
| H  | 3.462725  | 2.503346  | 0.563722  |
| H  | 5.556779  | 3.571048  | 0.093901  |
| H  | 5.637802  | 1.523019  | -2.897453 |
| H  | 5.880734  | -1.337556 | -1.899877 |
| H  | 3.337508  | 3.130742  | -1.071972 |
| H  | 6.404821  | -0.612180 | 0.344401  |
| H  | 5.689772  | 2.848867  | -1.487148 |
| H  | 6.167315  | 1.590545  | 1.233439  |
| H  | 7.259915  | 1.661226  | -0.131575 |
| C  | 3.717231  | 0.635138  | -2.404161 |
| H  | 3.226518  | -0.319647 | -2.640194 |
| H  | 3.252133  | 1.390295  | -3.059334 |
| C  | 3.425647  | 0.945446  | -0.914818 |
| H  | 2.331202  | 0.897392  | -0.793052 |
| B  | 4.184179  | -0.145220 | -0.003841 |
| C  | 4.667657  | -2.898252 | 0.031602  |
| H  | 5.673577  | -2.474484 | -0.033666 |
| H  | 4.583969  | -3.575996 | -0.829689 |
| O  | 3.672406  | 0.080698  | 1.581694  |
| H  | 3.419800  | -1.062505 | 1.074814  |
| C  | 4.552073  | -0.008505 | 2.693148  |
| H  | 5.403050  | -0.675243 | 2.501890  |
| H  | 4.942019  | 0.985167  | 2.941905  |
| H  | 3.996426  | -0.387704 | 3.559874  |
| Ag | 0.610257  | -0.774814 | -0.193819 |
| C  | -3.492675 | 0.688134  | 0.165381  |
| C  | -4.960758 | 0.550825  | 0.209624  |
| C  | -5.690961 | 1.625558  | 0.754158  |
| C  | -5.662883 | -0.568045 | -0.269448 |
| C  | -7.079453 | 1.579860  | 0.816895  |
| H  | -5.153397 | 2.491396  | 1.123875  |
| C  | -7.056872 | -0.606517 | -0.200806 |
| H  | -5.135648 | -1.408294 | -0.700459 |
| C  | -7.770353 | 0.461928  | 0.340855  |
| H  | -7.623782 | 2.418439  | 1.241937  |
| H  | -7.582428 | -1.479401 | -0.577577 |
| H  | -8.854930 | 0.425750  | 0.392333  |
| N  | -2.899840 | 1.834357  | 0.406728  |
| C  | 4.601026  | -3.736851 | 1.324215  |
| C  | 5.673572  | -4.830373 | 1.384674  |
| H  | 3.606760  | -4.191228 | 1.422787  |
| H  | 4.713929  | -3.070586 | 2.191785  |
| H  | 5.613558  | -5.404008 | 2.317626  |

|   |          |           |          |
|---|----------|-----------|----------|
| H | 5.565871 | -5.536957 | 0.551823 |
| H | 6.681232 | -4.400642 | 1.321446 |

12b-TS

|                                     |                     |         |         |
|-------------------------------------|---------------------|---------|---------|
| B3LYP SCF energy:                   | -2241.38641563 a.u. |         |         |
| B3LYP enthalpy:                     | -2240.278498 a.u.   |         |         |
| B3LYP free energy:                  | -2240.438319 a.u.   |         |         |
| B3LYP-D3BJ SCF energy in solution:  | -2243.54147389 a.u. |         |         |
| B3LYP-D3BJ enthalpy in solution:    | -2242.433556 a.u.   |         |         |
| B3LYP-D3BJ free energy in solution: | -2242.593377 a.u.   |         |         |
| Three lowest frequencies (cm-1):    | -1219.7721          | 10.8032 | 13.0030 |
| Imaginary frequency:                | -1219.7721 cm-1     |         |         |

Cartesian coordinates

| ATOM | X         | Y         | Z         |
|------|-----------|-----------|-----------|
| N    | -2.057099 | 1.479321  | -0.167686 |
| N    | -2.112367 | -0.642242 | -0.153116 |
| C    | -1.242616 | 0.413201  | -0.082213 |
| C    | -3.415609 | -0.153625 | -0.277459 |
| C    | -1.660444 | 2.867239  | -0.124753 |
| C    | -1.594485 | 3.506797  | 1.127920  |
| C    | -1.375336 | 3.518368  | -1.340111 |
| C    | -1.205365 | 4.852377  | 1.134646  |
| C    | -0.993678 | 4.863235  | -1.271398 |
| C    | -0.905465 | 5.522864  | -0.047926 |
| H    | -1.139340 | 5.380410  | 2.080837  |
| H    | -0.765756 | 5.400555  | -2.187380 |
| H    | -0.605167 | 6.566871  | -0.016763 |
| C    | -1.667147 | -2.018075 | -0.082362 |
| C    | -1.328735 | -2.675162 | -1.283449 |
| C    | -1.576011 | -2.633435 | 1.182391  |
| C    | -0.896698 | -4.003375 | -1.187792 |
| C    | -1.136022 | -3.963294 | 1.214258  |
| C    | -0.802515 | -4.642907 | 0.046196  |
| H    | -0.625996 | -4.541558 | -2.091475 |
| H    | -1.050753 | -4.470117 | 2.170638  |
| H    | -0.462488 | -5.673608 | 0.097074  |
| C    | -1.950987 | -1.930580 | 2.484919  |
| C    | -0.737927 | -1.780172 | 3.425221  |
| C    | -3.116653 | -2.652881 | 3.191330  |
| H    | -2.297531 | -0.920826 | 2.243615  |
| H    | 0.053734  | -1.168153 | 2.980598  |
| H    | -1.050989 | -1.294768 | 4.357262  |
| H    | -0.313526 | -2.756662 | 3.687203  |
| H    | -3.989988 | -2.745517 | 2.536330  |
| H    | -2.828838 | -3.660177 | 3.514447  |
| H    | -3.418224 | -2.093437 | 4.084189  |
| C    | -1.972529 | 2.815064  | 2.434069  |
| C    | -3.314784 | 3.366955  | 2.958137  |
| C    | -0.863634 | 2.911616  | 3.499137  |

|   |           |           |           |
|---|-----------|-----------|-----------|
| H | -2.121551 | 1.750995  | 2.225582  |
| H | -4.110968 | 3.249629  | 2.214546  |
| H | -3.613381 | 2.834621  | 3.868889  |
| H | -3.236878 | 4.432761  | 3.204120  |
| H | 0.064267  | 2.435354  | 3.161091  |
| H | -0.650031 | 3.953392  | 3.767653  |
| H | -1.191744 | 2.402571  | 4.413784  |
| C | -1.418403 | -2.002023 | -2.650437 |
| C | -2.346645 | -2.770721 | -3.611236 |
| C | -0.019019 | -1.805980 | -3.266429 |
| H | -1.851108 | -1.005993 | -2.514760 |
| H | -3.352010 | -2.884169 | -3.191390 |
| H | -2.434955 | -2.231106 | -4.561189 |
| H | -1.959220 | -3.771209 | -3.835471 |
| H | 0.623044  | -1.211858 | -2.607373 |
| H | 0.478171  | -2.766730 | -3.443559 |
| H | -0.096421 | -1.286188 | -4.228766 |
| C | -1.500401 | 2.826410  | -2.693328 |
| C | -0.200258 | 2.913832  | -3.514508 |
| C | -2.701640 | 3.384603  | -3.482803 |
| H | -1.696118 | 1.764132  | -2.517228 |
| H | 0.646693  | 2.492122  | -2.962343 |
| H | -0.308452 | 2.356065  | -4.452251 |
| H | 0.048681  | 3.948976  | -3.774830 |
| H | -3.632154 | 3.266889  | -2.917407 |
| H | -2.571976 | 4.451058  | -3.701748 |
| H | -2.810639 | 2.856774  | -4.437744 |
| C | 3.879624  | 0.747764  | -0.394454 |
| C | 3.024940  | 1.477688  | 0.406324  |
| C | 2.927551  | 2.991936  | 0.276685  |
| H | 2.492318  | 3.302733  | -0.686035 |
| H | 2.297019  | 3.404166  | 1.070709  |
| H | 3.910122  | 3.480900  | 0.347291  |
| C | 3.178389  | -3.696903 | -0.518572 |
| C | 2.649109  | -2.813659 | 0.630230  |
| C | 6.076385  | -2.275119 | -0.517013 |
| C | 3.560542  | -1.629791 | 1.053176  |
| C | 5.866339  | -2.867350 | 0.893614  |
| C | 4.878215  | -2.067263 | 1.766966  |
| H | 2.349079  | -4.298460 | -0.916681 |
| H | 2.424454  | -3.448900 | 1.501105  |
| H | 6.770026  | -1.425694 | -0.435059 |
| H | 6.837979  | -2.917729 | 1.404940  |
| H | 3.900972  | -4.421674 | -0.130370 |
| H | 1.682482  | -2.389294 | 0.318524  |
| H | 6.587678  | -3.015328 | -1.152105 |
| H | 2.995523  | -1.028954 | 1.772596  |
| H | 5.528145  | -3.905177 | 0.814245  |
| H | 5.381691  | -1.159036 | 2.130129  |
| H | 4.634418  | -2.652269 | 2.667094  |
| C | 3.819686  | -2.899940 | -1.671593 |
| H | 3.017565  | -2.443251 | -2.271750 |

|    |           |           |           |
|----|-----------|-----------|-----------|
| H  | 4.339102  | -3.595663 | -2.348963 |
| C  | 4.786787  | -1.764941 | -1.232843 |
| H  | 5.120310  | -1.263462 | -2.151853 |
| B  | 4.024532  | -0.801667 | -0.217810 |
| C  | 4.753793  | 1.453426  | -1.432792 |
| H  | 4.876157  | 0.817375  | -2.319063 |
| H  | 4.277776  | 2.378051  | -1.783979 |
| C  | 2.416099  | 0.653074  | 3.914190  |
| H  | 1.629488  | 0.627413  | 4.688541  |
| H  | 3.133923  | 1.436568  | 4.221772  |
| H  | 2.952667  | -0.314402 | 3.973428  |
| O  | 1.864850  | 0.897951  | 2.655236  |
| H  | 2.577721  | 1.092102  | 1.631808  |
| Ag | 0.884532  | 0.586846  | 0.273262  |
| C  | -4.686713 | -0.896699 | -0.377569 |
| C  | -4.781983 | -2.296722 | -0.452453 |
| C  | -5.873152 | -0.136768 | -0.403218 |
| C  | -6.030995 | -2.913390 | -0.549834 |
| H  | -3.893979 | -2.913136 | -0.436496 |
| C  | -7.112629 | -0.759103 | -0.501287 |
| H  | -5.805638 | 0.943577  | -0.345230 |
| C  | -7.198627 | -2.152339 | -0.574846 |
| H  | -6.083571 | -3.996961 | -0.606240 |
| H  | -8.014857 | -0.154230 | -0.518618 |
| H  | -8.167417 | -2.638158 | -0.650225 |
| N  | -3.383758 | 1.159793  | -0.289585 |
| C  | 6.160578  | 1.804883  | -0.901481 |
| C  | 7.030496  | 2.521501  | -1.939796 |
| H  | 6.664142  | 0.885638  | -0.573949 |
| H  | 6.062948  | 2.431085  | -0.004707 |
| H  | 8.023916  | 2.755549  | -1.538741 |
| H  | 7.169461  | 1.902132  | -2.834848 |
| H  | 6.569525  | 3.464560  | -2.259654 |

13

B3LYP SCF energy: -2241.45810126 a.u.  
 B3LYP enthalpy: -2240.343906 a.u.  
 B3LYP free energy: -2240.499978 a.u.  
 B3LYP-D3BJ SCF energy in solution: -2243.61789487 a.u.  
 B3LYP-D3BJ enthalpy in solution: -2242.503700 a.u.  
 B3LYP-D3BJ free energy in solution: -2242.659772 a.u.  
 Three lowest frequencies (cm-1): 8.7560 10.3371 18.4627

Cartesian coordinates

| ATOM | X        | Y         | Z         |
|------|----------|-----------|-----------|
| N    | 1.860997 | 1.645366  | -0.029712 |
| N    | 2.371205 | -0.418243 | 0.007090  |
| C    | 1.309317 | 0.434897  | 0.152471  |
| C    | 1.184031 | 2.920774  | -0.001718 |
| C    | 0.677929 | 3.433265  | -1.211324 |

|   |           |           |           |
|---|-----------|-----------|-----------|
| C | 1.088633  | 3.602997  | 1.225637  |
| C | 0.044913  | 4.681026  | -1.159262 |
| C | 0.441757  | 4.844611  | 1.217495  |
| C | -0.075497 | 5.378162  | 0.040124  |
| H | -0.359550 | 5.111195  | -2.070339 |
| H | 0.345643  | 5.401366  | 2.144968  |
| H | -0.574361 | 6.343247  | 0.056816  |
| C | 2.231668  | -1.859528 | 0.081350  |
| C | 2.260046  | -2.474819 | 1.350749  |
| C | 2.051184  | -2.581078 | -1.116172 |
| C | 2.115155  | -3.866904 | 1.390845  |
| C | 1.911156  | -3.970564 | -1.011052 |
| C | 1.943794  | -4.608897 | 0.225102  |
| H | 2.129846  | -4.375014 | 2.350535  |
| H | 1.765832  | -4.558130 | -1.912396 |
| H | 1.827864  | -5.687617 | 0.281529  |
| C | 2.002405  | -1.922611 | -2.492384 |
| C | 0.640229  | -2.148541 | -3.177864 |
| C | 3.159712  | -2.404578 | -3.390524 |
| H | 2.122240  | -0.842213 | -2.362136 |
| H | -0.188192 | -1.787202 | -2.560606 |
| H | 0.610670  | -1.618531 | -4.137000 |
| H | 0.465225  | -3.211150 | -3.381037 |
| H | 4.134001  | -2.221215 | -2.925565 |
| H | 3.082207  | -3.477854 | -3.599755 |
| H | 3.135157  | -1.877918 | -4.351481 |
| C | 0.823434  | 2.704407  | -2.543225 |
| C | 1.834445  | 3.432056  | -3.452743 |
| C | -0.529223 | 2.507174  | -3.253603 |
| H | 1.228554  | 1.707084  | -2.344624 |
| H | 2.812343  | 3.518773  | -2.966833 |
| H | 1.964518  | 2.883789  | -4.393221 |
| H | 1.489448  | 4.443034  | -3.699637 |
| H | -1.248662 | 1.983255  | -2.615405 |
| H | -0.975905 | 3.463340  | -3.549293 |
| H | -0.388256 | 1.916326  | -4.166199 |
| C | 2.442086  | -1.699663 | 2.653681  |
| C | 3.735848  | -2.110019 | 3.385792  |
| C | 1.216000  | -1.853757 | 3.575815  |
| H | 2.531653  | -0.635852 | 2.412509  |
| H | 4.620959  | -1.950851 | 2.760197  |
| H | 3.856890  | -1.516165 | 4.299020  |
| H | 3.714568  | -3.166398 | 3.677234  |
| H | 0.295536  | -1.536195 | 3.073842  |
| H | 1.079901  | -2.893719 | 3.893602  |
| H | 1.343181  | -1.243546 | 4.477652  |
| C | 1.678995  | 3.058007  | 2.521973  |
| C | 0.617569  | 2.935377  | 3.631667  |
| C | 2.876900  | 3.912895  | 2.981681  |
| H | 2.058789  | 2.049816  | 2.328309  |
| H | -0.220110 | 2.305592  | 3.312157  |
| H | 1.059513  | 2.487712  | 4.529551  |

|    |           |           |           |
|----|-----------|-----------|-----------|
| H  | 0.211637  | 3.912787  | 3.916093  |
| H  | 3.650709  | 3.954866  | 2.207861  |
| H  | 2.569058  | 4.940461  | 3.207754  |
| H  | 3.322463  | 3.489518  | 3.889704  |
| C  | -4.296266 | 0.691322  | -0.389240 |
| C  | -3.521869 | 1.796928  | -0.311553 |
| C  | -3.796306 | 3.210380  | -0.771494 |
| H  | -4.708669 | 3.308280  | -1.366541 |
| H  | -3.894433 | 3.893311  | 0.086532  |
| H  | -2.963318 | 3.599300  | -1.374172 |
| C  | -5.159719 | -2.899791 | -1.535576 |
| C  | -5.822382 | -2.398643 | -0.224737 |
| C  | -2.252079 | -2.885181 | -0.222919 |
| C  | -4.865160 | -1.819081 | 0.854922  |
| C  | -3.137105 | -3.756993 | 0.696274  |
| C  | -4.107413 | -2.956134 | 1.588605  |
| H  | -5.913984 | -2.910399 | -2.336110 |
| H  | -6.401235 | -3.233621 | 0.204033  |
| H  | -1.414675 | -2.508470 | 0.386255  |
| H  | -2.487651 | -4.378765 | 1.331081  |
| H  | -4.862320 | -3.946839 | -1.413539 |
| H  | -6.568651 | -1.637845 | -0.475931 |
| H  | -1.786090 | -3.532640 | -0.985230 |
| H  | -5.517431 | -1.349066 | 1.610492  |
| H  | -3.706753 | -4.468740 | 0.089327  |
| H  | -3.535523 | -2.526600 | 2.421092  |
| H  | -4.823138 | -3.661511 | 2.042493  |
| C  | -3.931157 | -2.090661 | -2.015852 |
| H  | -4.272853 | -1.179207 | -2.523604 |
| H  | -3.409669 | -2.684379 | -2.785612 |
| C  | -2.957575 | -1.674850 | -0.890364 |
| H  | -2.162501 | -1.073582 | -1.382463 |
| B  | -3.763608 | -0.759770 | 0.215652  |
| C  | -5.674027 | 0.841526  | -1.032855 |
| H  | -5.959616 | -0.073883 | -1.559193 |
| H  | -5.669491 | 1.625291  | -1.803318 |
| O  | -2.693873 | -0.433548 | 1.333758  |
| H  | -2.553882 | 1.711878  | 0.192208  |
| C  | -3.151864 | 0.202212  | 2.516542  |
| H  | -3.568071 | 1.195453  | 2.304517  |
| H  | -3.930290 | -0.402330 | 2.997232  |
| H  | -2.315762 | 0.304961  | 3.220605  |
| Ag | -0.708570 | -0.001991 | 0.613126  |
| C  | 3.518795  | 0.330763  | -0.257341 |
| C  | 4.894218  | -0.136915 | -0.509278 |
| C  | 5.799449  | 0.791160  | -1.059808 |
| C  | 5.349511  | -1.432745 | -0.212472 |
| C  | 7.120229  | 0.431227  | -1.305806 |
| H  | 5.451583  | 1.791980  | -1.289662 |
| C  | 6.676265  | -1.785939 | -0.464368 |
| H  | 4.682257  | -2.168239 | 0.216228  |
| C  | 7.564999  | -0.860441 | -1.010502 |



|   |           |           |           |
|---|-----------|-----------|-----------|
| H | 7.803089  | 1.159955  | -1.733158 |
| H | 7.011709  | -2.791660 | -0.227956 |
| H | 8.595952  | -1.141940 | -1.205599 |
| N | 3.208217  | 1.607576  | -0.277775 |
| C | -6.781807 | 1.186481  | -0.016339 |
| C | -8.167089 | 1.318371  | -0.659300 |
| H | -6.517914 | 2.125203  | 0.489797  |
| H | -6.810484 | 0.417962  | 0.766023  |
| H | -8.933464 | 1.576271  | 0.082107  |
| H | -8.173910 | 2.099183  | -1.431012 |
| H | -8.472103 | 0.379928  | -1.139492 |

14-TS

|                                     |                     |         |         |
|-------------------------------------|---------------------|---------|---------|
| B3LYP SCF energy:                   | -2241.43899892 a.u. |         |         |
| B3LYP enthalpy:                     | -2240.326167 a.u.   |         |         |
| B3LYP free energy:                  | -2240.481093 a.u.   |         |         |
| B3LYP-D3BJ SCF energy in solution:  | -2243.59776086 a.u. |         |         |
| B3LYP-D3BJ enthalpy in solution:    | -2242.484929 a.u.   |         |         |
| B3LYP-D3BJ free energy in solution: | -2242.639855 a.u.   |         |         |
| Three lowest frequencies (cm-1):    | -214.9209           | 12.7386 | 14.8852 |
| Imaginary frequency:                | -214.9209 cm-1      |         |         |

Cartesian coordinates

| ATOM | X         | Y         | Z         |
|------|-----------|-----------|-----------|
| N    | -2.309538 | -0.112863 | 0.018067  |
| N    | -1.271429 | 1.728311  | 0.220246  |
| C    | -1.043479 | 0.406189  | 0.128414  |
| C    | -3.236197 | 0.931157  | 0.043225  |
| C    | -2.567314 | -1.531358 | -0.120162 |
| C    | -2.740216 | -2.062998 | -1.414401 |
| C    | -2.629894 | -2.323635 | 1.046102  |
| C    | -2.992038 | -3.437031 | -1.516567 |
| C    | -2.888042 | -3.690208 | 0.880297  |
| C    | -3.067891 | -4.243465 | -0.384669 |
| H    | -3.129512 | -3.880218 | -2.498508 |
| H    | -2.944359 | -4.329727 | 1.756247  |
| H    | -3.264949 | -5.307016 | -0.488419 |
| C    | -0.287922 | 2.775954  | 0.371524  |
| C    | 0.099912  | 3.146920  | 1.673273  |
| C    | 0.204543  | 3.403853  | -0.787519 |
| C    | 1.030749  | 4.185797  | 1.791181  |
| C    | 1.131346  | 4.437874  | -0.608296 |
| C    | 1.542370  | 4.823841  | 0.664238  |
| H    | 1.357380  | 4.501026  | 2.777508  |
| H    | 1.539284  | 4.943897  | -1.477682 |
| H    | 2.266221  | 5.626099  | 0.778701  |
| C    | -0.257093 | 3.023890  | -2.189901 |
| C    | 0.925844  | 2.757936  | -3.139198 |
| C    | -1.208935 | 4.096684  | -2.757027 |
| H    | -0.824526 | 2.090264  | -2.118452 |

|   |           |           |           |
|---|-----------|-----------|-----------|
| H | 1.602467  | 2.006662  | -2.720050 |
| H | 0.552654  | 2.398102  | -4.105915 |
| H | 1.502799  | 3.669504  | -3.334594 |
| H | -2.077659 | 4.240447  | -2.105394 |
| H | -0.698937 | 5.062155  | -2.857561 |
| H | -1.568075 | 3.802241  | -3.750535 |
| C | -2.670411 | -1.216451 | -2.682557 |
| C | -4.006478 | -1.236300 | -3.452232 |
| C | -1.505511 | -1.658331 | -3.589405 |
| H | -2.476815 | -0.178713 | -2.394207 |
| H | -4.837648 | -0.902187 | -2.822846 |
| H | -3.949449 | -0.573444 | -4.323300 |
| H | -4.242890 | -2.242663 | -3.817354 |
| H | -0.548046 | -1.604151 | -3.062259 |
| H | -1.639357 | -2.687589 | -3.942103 |
| H | -1.446473 | -1.009664 | -4.471228 |
| C | -0.487825 | 2.497667  | 2.921854  |
| C | -1.520529 | 3.434148  | 3.581980  |
| C | 0.594245  | 2.060636  | 3.925948  |
| H | -1.019996 | 1.591564  | 2.615382  |
| H | -2.323194 | 3.689613  | 2.882166  |
| H | -1.969063 | 2.953923  | 4.460070  |
| H | -1.049671 | 4.367665  | 3.912392  |
| H | 1.329823  | 1.399681  | 3.455142  |
| H | 1.132720  | 2.916638  | 4.347725  |
| H | 0.133956  | 1.520827  | 4.761895  |
| C | -2.447567 | -1.758913 | 2.453304  |
| C | -1.268311 | -2.429741 | 3.184544  |
| C | -3.744150 | -1.871874 | 3.281161  |
| H | -2.207800 | -0.694877 | 2.367568  |
| H | -0.339835 | -2.332690 | 2.612736  |
| H | -1.119564 | -1.960865 | 4.164454  |
| H | -1.453977 | -3.496963 | 3.353181  |
| H | -4.577641 | -1.345767 | 2.803093  |
| H | -4.040833 | -2.918300 | 3.418410  |
| H | -3.596002 | -1.435402 | 4.275651  |
| C | 2.446215  | -0.827490 | -2.745279 |
| C | 6.230676  | -0.109260 | 1.091002  |
| C | 5.002727  | 0.778958  | 1.403879  |
| C | 5.738466  | 0.031913  | -2.080362 |
| C | 4.052217  | 1.068220  | 0.214639  |
| C | 5.905719  | 1.486185  | -1.577326 |
| C | 4.688448  | 2.054130  | -0.812692 |
| H | 6.635990  | -0.499135 | 2.036118  |
| H | 5.360738  | 1.729269  | 1.832675  |
| H | 5.133577  | 0.053615  | -2.996640 |
| H | 6.120953  | 2.133766  | -2.439781 |
| H | 7.032274  | 0.507091  | 0.671426  |
| H | 4.425925  | 0.296565  | 2.199678  |
| H | 6.725691  | -0.354315 | -2.380207 |
| H | 3.164596  | 1.578907  | 0.620851  |
| H | 6.793778  | 1.551043  | -0.941115 |

|    |           |           |           |
|----|-----------|-----------|-----------|
| H  | 3.913021  | 2.334112  | -1.535303 |
| H  | 4.992450  | 2.984034  | -0.305629 |
| C  | 5.951371  | -1.293440 | 0.140404  |
| H  | 5.461697  | -2.093381 | 0.709393  |
| H  | 6.916358  | -1.707220 | -0.193536 |
| C  | 5.063749  | -0.963317 | -1.080690 |
| H  | 4.928182  | -1.904154 | -1.633361 |
| B  | 3.683972  | -0.233986 | -0.664807 |
| C  | 2.680857  | -1.840837 | 0.549532  |
| O  | 2.742318  | 0.073611  | -1.708416 |
| Ag | 0.858009  | -0.620706 | 0.203708  |
| H  | 1.974356  | -0.272732 | -3.565650 |
| H  | 3.336990  | -1.333923 | -3.139673 |
| H  | 1.737129  | -1.601895 | -2.407808 |
| C  | 2.863934  | -1.770513 | 1.897056  |
| C  | 3.286754  | -2.849488 | 2.869382  |
| H  | 2.727552  | -0.805142 | 2.387016  |
| H  | 4.210327  | -2.557418 | 3.389734  |
| H  | 2.524953  | -2.987648 | 3.650124  |
| H  | 3.458083  | -3.818776 | 2.395024  |
| C  | 2.827385  | -3.203338 | -0.130440 |
| H  | 3.064437  | -3.071818 | -1.192423 |
| H  | 3.677583  | -3.766603 | 0.285703  |
| C  | -4.704784 | 0.874623  | -0.083571 |
| C  | -5.371671 | 2.077748  | -0.386459 |
| C  | -5.466220 | -0.292100 | 0.098602  |
| C  | -6.757316 | 2.110134  | -0.503566 |
| H  | -4.788008 | 2.980482  | -0.527401 |
| C  | -6.856437 | -0.251327 | -0.022444 |
| H  | -4.986999 | -1.231760 | 0.337733  |
| C  | -7.507275 | 0.944512  | -0.323961 |
| H  | -7.252672 | 3.047542  | -0.740228 |
| H  | -7.428612 | -1.163142 | 0.123378  |
| H  | -8.589242 | 0.969652  | -0.418645 |
| N  | -2.599002 | 2.071618  | 0.173191  |
| C  | 1.570510  | -4.088234 | -0.032162 |
| C  | 1.715593  | -5.426525 | -0.765465 |
| H  | 0.709634  | -3.538950 | -0.441122 |
| H  | 1.334392  | -4.269344 | 1.025241  |
| H  | 0.801706  | -6.028454 | -0.688828 |
| H  | 1.925489  | -5.272762 | -1.831655 |
| H  | 2.540889  | -6.019579 | -0.351596 |

B-OMe

|                                     |                    |
|-------------------------------------|--------------------|
| B3LYP SCF energy:                   | -453.32185876 a.u. |
| B3LYP enthalpy:                     | -453.055173 a.u.   |
| B3LYP free energy:                  | -453.103725 a.u.   |
| B3LYP-D3BJ SCF energy in solution:  | -453.50438655 a.u. |
| B3LYP-D3BJ enthalpy in solution:    | -453.237701 a.u.   |
| B3LYP-D3BJ free energy in solution: | -453.286253 a.u.   |

Three lowest frequencies (cm-1):            45.4635            57.5354            107.4385

Cartesian coordinates

| ATOM | X         | Y         | Z         |
|------|-----------|-----------|-----------|
| C    | -1.574084 | 1.578513  | 0.279145  |
| C    | -0.495499 | 1.309808  | 1.351814  |
| C    | -1.118864 | -1.305646 | -1.176205 |
| C    | 0.320536  | -0.005799 | 1.169834  |
| C    | -1.585293 | -1.571900 | 0.272232  |
| C    | -0.508313 | -1.313061 | 1.349006  |
| H    | -1.899763 | 2.624330  | 0.362741  |
| H    | -0.965374 | 1.324153  | 2.346589  |
| H    | -0.487197 | -2.145871 | -1.500994 |
| H    | -1.918260 | -2.615706 | 0.352132  |
| H    | -2.464228 | 0.981407  | 0.498057  |
| H    | 0.218634  | 2.147067  | 1.346809  |
| H    | -1.994160 | -1.314318 | -1.843114 |
| H    | 1.096134  | -0.009261 | 1.948224  |
| H    | -2.472215 | -0.969380 | 0.489443  |
| H    | 0.198149  | -2.156776 | 1.346308  |
| H    | -0.982087 | -1.323449 | 2.342005  |
| C    | -1.113756 | 1.312839  | -1.171424 |
| H    | -0.480118 | 2.151257  | -1.496911 |
| H    | -1.991198 | 1.325692  | -1.835460 |
| C    | -0.300555 | 0.002395  | -1.377428 |
| H    | 0.081806  | 0.003527  | -2.406968 |
| B    | 0.868519  | -0.002281 | -0.316281 |
| O    | 2.158257  | -0.000084 | -0.746716 |
| C    | 3.306973  | -0.005646 | 0.089988  |
| H    | 3.055795  | -0.131019 | 1.147838  |
| H    | 3.960454  | -0.826699 | -0.223070 |
| H    | 3.848110  | 0.938099  | -0.040272 |

15

B3LYP SCF energy:                            -1788.15017461 a.u.  
B3LYP enthalpy:                              -1787.304615 a.u.  
B3LYP free energy:                           -1787.439023 a.u.  
B3LYP-D3BJ SCF energy in solution:       -1790.09436826 a.u.  
B3LYP-D3BJ enthalpy in solution:       -1789.248809 a.u.  
B3LYP-D3BJ free energy in solution:      -1789.383217 a.u.  
Three lowest frequencies (cm-1):        11.1530            15.8416            17.2208

Cartesian coordinates

| ATOM | X         | Y         | Z         |
|------|-----------|-----------|-----------|
| N    | -1.430961 | 0.125510  | 0.079157  |
| N    | -0.163986 | -1.573347 | 0.004838  |
| C    | -0.108977 | -0.229697 | -0.005978 |
| C    | -2.215883 | -1.028411 | 0.130231  |
| C    | -1.857857 | 1.509338  | 0.083439  |
| C    | -1.885429 | 2.203591  | 1.310694  |

|   |           |           |           |
|---|-----------|-----------|-----------|
| C | -2.201884 | 2.112272  | -1.142882 |
| C | -2.295699 | 3.542308  | 1.281518  |
| C | -2.603364 | 3.453378  | -1.109937 |
| C | -2.653864 | 4.162002  | 0.087120  |
| H | -2.327382 | 4.107935  | 2.207927  |
| H | -2.872312 | 3.949833  | -2.037714 |
| H | -2.966438 | 5.202712  | 0.088695  |
| C | 0.956182  | -2.481145 | -0.058115 |
| C | 1.405690  | -2.906020 | -1.322206 |
| C | 1.536572  | -2.914774 | 1.148445  |
| C | 2.490599  | -3.790593 | -1.352608 |
| C | 2.616577  | -3.801139 | 1.058233  |
| C | 3.091078  | -4.233780 | -0.177256 |
| H | 2.868926  | -4.135907 | -2.310382 |
| H | 3.092624  | -4.154926 | 1.968137  |
| H | 3.932746  | -4.919627 | -0.224167 |
| C | 1.026600  | -2.471168 | 2.515359  |
| C | 2.129745  | -1.782245 | 3.340815  |
| C | 0.401649  | -3.653388 | 3.282327  |
| H | 0.233993  | -1.732963 | 2.360872  |
| H | 2.541529  | -0.919464 | 2.806601  |
| H | 1.723104  | -1.431748 | 4.296907  |
| H | 2.955630  | -2.467248 | 3.564352  |
| H | -0.416826 | -4.104625 | 2.711296  |
| H | 1.143087  | -4.435087 | 3.485568  |
| H | 0.001725  | -3.314047 | 4.245240  |
| C | -1.490552 | 1.564248  | 2.639646  |
| C | -2.665606 | 1.549383  | 3.637700  |
| C | -0.254328 | 2.256083  | 3.248230  |
| H | -1.214626 | 0.522557  | 2.449264  |
| H | -3.531634 | 1.013819  | 3.233237  |
| H | -2.364600 | 1.051776  | 4.566861  |
| H | -2.987733 | 2.564908  | 3.895809  |
| H | 0.595068  | 2.233015  | 2.557291  |
| H | -0.462005 | 3.304139  | 3.494132  |
| H | 0.042177  | 1.749315  | 4.174123  |
| C | 0.757163  | -2.452280 | -2.625644 |
| C | 0.116659  | -3.640281 | -3.370256 |
| C | 1.754574  | -1.695330 | -3.523649 |
| H | -0.048641 | -1.753638 | -2.381459 |
| H | -0.623417 | -4.147125 | -2.741476 |
| H | -0.386539 | -3.292316 | -4.280128 |
| H | 0.868849  | -4.380098 | -3.667986 |
| H | 2.169473  | -0.824040 | -3.005532 |
| H | 2.589385  | -2.336513 | -3.830060 |
| H | 1.253506  | -1.345501 | -4.434090 |
| C | -2.134682 | 1.377129  | -2.478113 |
| C | -1.042123 | 1.978637  | -3.384825 |
| C | -3.502191 | 1.353541  | -3.188730 |
| H | -1.854790 | 0.337123  | -2.284220 |
| H | -0.062497 | 1.953101  | -2.895761 |
| H | -0.974187 | 1.413423  | -4.321947 |

|    |           |           |           |
|----|-----------|-----------|-----------|
| H  | -1.264628 | 3.021641  | -3.638677 |
| H  | -4.274213 | 0.903566  | -2.555263 |
| H  | -3.833804 | 2.362689  | -3.459495 |
| H  | -3.436395 | 0.769031  | -4.113719 |
| C  | 3.318869  | 2.307226  | -0.384690 |
| C  | 3.135052  | 3.644211  | -0.436385 |
| C  | 4.158356  | 4.751097  | -0.593011 |
| H  | 5.188492  | 4.387710  | -0.640764 |
| H  | 3.971400  | 5.334392  | -1.507170 |
| H  | 4.097049  | 5.462588  | 0.243793  |
| C  | 4.697135  | 1.674334  | -0.473562 |
| H  | 5.490274  | 2.414129  | -0.665789 |
| H  | 4.719491  | 0.981411  | -1.329650 |
| H  | 2.114954  | 4.030431  | -0.361814 |
| Ag | 1.641142  | 1.044721  | -0.182950 |
| C  | -3.684654 | -1.151388 | 0.187287  |
| C  | -4.552390 | -0.088174 | 0.488786  |
| C  | -4.235249 | -2.423343 | -0.064924 |
| C  | -5.932218 | -0.296619 | 0.532784  |
| H  | -4.164185 | 0.900188  | 0.694211  |
| C  | -5.610808 | -2.622670 | -0.017307 |
| H  | -3.569033 | -3.246461 | -0.297487 |
| C  | -6.467491 | -1.558989 | 0.279972  |
| H  | -6.587164 | 0.537303  | 0.768918  |
| H  | -6.015703 | -3.610859 | -0.216824 |
| H  | -7.542184 | -1.714580 | 0.313898  |
| N  | -1.435651 | -2.084119 | 0.088824  |
| C  | 5.090708  | 0.878111  | 0.784418  |
| C  | 6.452072  | 0.184443  | 0.663170  |
| H  | 4.311422  | 0.130109  | 0.989607  |
| H  | 5.096192  | 1.557661  | 1.648262  |
| H  | 6.704142  | -0.373194 | 1.573787  |
| H  | 6.460424  | -0.524862 | -0.174703 |
| H  | 7.255563  | 0.910719  | 0.485843  |

16-TS

|                                     |                     |        |         |
|-------------------------------------|---------------------|--------|---------|
| B3LYP SCF energy:                   | -2360.54473682 a.u. |        |         |
| B3LYP enthalpy:                     | -2359.325280 a.u.   |        |         |
| B3LYP free energy:                  | -2359.494668 a.u.   |        |         |
| B3LYP-D3BJ SCF energy in solution:  | -2362.76640020 a.u. |        |         |
| B3LYP-D3BJ enthalpy in solution:    | -2361.546943 a.u.   |        |         |
| B3LYP-D3BJ free energy in solution: | -2361.716331 a.u.   |        |         |
| Three lowest frequencies (cm-1):    | -1060.8785          | 9.9489 | 12.8921 |
| Imaginary frequency:                | -1060.8785 cm-1     |        |         |

Cartesian coordinates

| ATOM | X        | Y         | Z         |
|------|----------|-----------|-----------|
| N    | 2.543352 | 1.285418  | -0.599351 |
| N    | 2.586653 | -0.751048 | 0.004147  |
| C    | 1.764018 | 0.343043  | -0.043253 |

|   |           |           |           |
|---|-----------|-----------|-----------|
| C | 2.177913  | 2.652324  | -0.889473 |
| C | 1.704863  | 2.957156  | -2.181492 |
| C | 2.339534  | 3.619431  | 0.119951  |
| C | 1.370749  | 4.291426  | -2.439952 |
| C | 1.985026  | 4.937567  | -0.195067 |
| C | 1.504652  | 5.270613  | -1.458022 |
| H | 1.001064  | 4.568907  | -3.421858 |
| H | 2.091776  | 5.712364  | 0.558260  |
| H | 1.235807  | 6.299597  | -1.680812 |
| C | 2.150723  | -2.018478 | 0.556512  |
| C | 2.392850  | -2.278052 | 1.920657  |
| C | 1.474196  | -2.922320 | -0.288893 |
| C | 1.940880  | -3.502006 | 2.429417  |
| C | 1.043051  | -4.128363 | 0.278058  |
| C | 1.273829  | -4.417970 | 1.620302  |
| H | 2.108664  | -3.736968 | 3.476423  |
| H | 0.511997  | -4.845593 | -0.340398 |
| H | 0.927361  | -5.359044 | 2.038292  |
| C | 1.201865  | -2.641514 | -1.764409 |
| C | -0.310377 | -2.555947 | -2.048604 |
| C | 1.876645  | -3.686337 | -2.676042 |
| H | 1.636441  | -1.668464 | -2.014652 |
| H | -0.801615 | -1.798999 | -1.428289 |
| H | -0.482325 | -2.299329 | -3.100266 |
| H | -0.810245 | -3.511567 | -1.855883 |
| H | 2.959663  | -3.724459 | -2.514701 |
| H | 1.473445  | -4.690609 | -2.503112 |
| H | 1.700139  | -3.436394 | -3.728369 |
| C | 1.607101  | 1.903910  | -3.280801 |
| C | 2.855052  | 1.958133  | -4.187590 |
| C | 0.316674  | 2.014937  | -4.111793 |
| H | 1.592103  | 0.918756  | -2.802119 |
| H | 3.771505  | 1.813146  | -3.607046 |
| H | 2.804236  | 1.175586  | -4.953945 |
| H | 2.923970  | 2.926390  | -4.697722 |
| H | -0.574575 | 1.997539  | -3.475781 |
| H | 0.289016  | 2.932827  | -4.709697 |
| H | 0.252031  | 1.172914  | -4.810036 |
| C | 3.109970  | -1.295716 | 2.842753  |
| C | 4.424394  | -1.888017 | 3.388974  |
| C | 2.191497  | -0.828942 | 3.989322  |
| H | 3.373753  | -0.406855 | 2.260745  |
| H | 5.094775  | -2.188635 | 2.576939  |
| H | 4.945935  | -1.146773 | 4.005434  |
| H | 4.238036  | -2.768040 | 4.015417  |
| H | 1.270157  | -0.379005 | 3.603729  |
| H | 1.910456  | -1.662744 | 4.642973  |
| H | 2.706172  | -0.082762 | 4.606007  |
| C | 2.909762  | 3.293214  | 1.496633  |
| C | 1.967185  | 3.725796  | 2.635398  |
| C | 4.312358  | 3.911567  | 1.665946  |
| H | 3.024563  | 2.207584  | 1.571717  |

|    |           |           |           |
|----|-----------|-----------|-----------|
| H  | 0.979056  | 3.264639  | 2.531328  |
| H  | 2.384272  | 3.424801  | 3.603536  |
| H  | 1.829977  | 4.812760  | 2.659989  |
| H  | 4.994848  | 3.561687  | 0.884056  |
| H  | 4.273473  | 5.005911  | 1.614466  |
| H  | 4.735186  | 3.636675  | 2.639411  |
| C  | -2.229008 | -0.266043 | 2.575241  |
| C  | -2.210525 | 0.751869  | 1.669317  |
| C  | -2.639142 | 2.154826  | 2.091850  |
| H  | -3.727988 | 2.154961  | 2.250588  |
| H  | -2.192986 | 2.422774  | 3.063584  |
| C  | -2.659846 | -0.227511 | 4.018172  |
| H  | -2.737634 | 0.787913  | 4.415598  |
| H  | -3.645207 | -0.705156 | 4.121605  |
| H  | -1.968784 | -0.800066 | 4.650472  |
| Ag | -0.247660 | 0.527159  | 0.703360  |
| C  | -2.896161 | 0.670412  | -1.691579 |
| H  | -1.917554 | 1.123340  | -1.468794 |
| H  | -3.618707 | 1.472695  | -1.884111 |
| H  | -2.796161 | 0.059553  | -2.594098 |
| O  | -3.281975 | -0.138114 | -0.595483 |
| H  | -2.738718 | 0.265684  | 0.400430  |
| H  | -1.990465 | -1.270710 | 2.219316  |
| C  | 3.831385  | -0.408269 | -0.526241 |
| C  | -4.150420 | -3.472407 | -1.154338 |
| C  | -4.337226 | -2.395083 | -2.244695 |
| C  | -6.424081 | -2.184557 | 0.778881  |
| C  | -5.320925 | -1.251227 | -1.879606 |
| C  | -7.103524 | -2.639058 | -0.533288 |
| C  | -6.782186 | -1.769064 | -1.773849 |
| H  | -3.269952 | -4.086047 | -1.402525 |
| H  | -4.656324 | -2.892340 | -3.176169 |
| H  | -6.986803 | -1.335704 | 1.192409  |
| H  | -8.193430 | -2.656222 | -0.384458 |
| H  | -4.995183 | -4.168372 | -1.181157 |
| H  | -3.352787 | -1.958986 | -2.463101 |
| H  | -6.522938 | -2.995315 | 1.520242  |
| H  | -5.312378 | -0.547082 | -2.730451 |
| H  | -6.830127 | -3.679995 | -0.736056 |
| H  | -7.453896 | -0.904539 | -1.774185 |
| H  | -7.044181 | -2.345266 | -2.677090 |
| C  | -3.988578 | -2.909637 | 0.275167  |
| H  | -2.958440 | -2.540177 | 0.380080  |
| H  | -4.088066 | -3.741545 | 0.993693  |
| C  | -4.943866 | -1.747144 | 0.638112  |
| H  | -4.638355 | -1.386200 | 1.635052  |
| B  | -4.884518 | -0.545566 | -0.465494 |
| C  | -5.593840 | 0.870516  | 0.019255  |
| H  | -5.546835 | 0.910777  | 1.122987  |
| H  | -4.960810 | 1.714813  | -0.305633 |
| C  | 5.044139  | -1.236138 | -0.662791 |
| C  | 6.242513  | -0.572488 | -0.991781 |



|   |           |           |           |
|---|-----------|-----------|-----------|
| C | 5.066715  | -2.631628 | -0.499641 |
| C | 7.425933  | -1.285182 | -1.151376 |
| H | 6.229760  | 0.504071  | -1.119057 |
| C | 6.259710  | -3.338808 | -0.659746 |
| H | 4.163907  | -3.174397 | -0.254723 |
| C | 7.440983  | -2.672813 | -0.984275 |
| H | 8.340050  | -0.755298 | -1.403599 |
| H | 6.258074  | -4.417410 | -0.531457 |
| H | 8.366252  | -3.228686 | -1.106711 |
| N | 3.808086  | 0.850655  | -0.902570 |
| C | -2.304192 | 3.267846  | 1.088903  |
| C | -2.758621 | 4.653449  | 1.559252  |
| H | -2.772363 | 3.038256  | 0.123608  |
| H | -1.218159 | 3.281037  | 0.907547  |
| H | -2.501937 | 5.429311  | 0.828319  |
| H | -3.845013 | 4.681357  | 1.707487  |
| H | -2.288027 | 4.924147  | 2.513327  |
| C | -7.029402 | 1.254969  | -0.386852 |
| C | -7.463216 | 2.624721  | 0.154632  |
| H | -7.745630 | 0.500116  | -0.036469 |
| H | -7.116625 | 1.265577  | -1.482733 |
| H | -8.487289 | 2.881847  | -0.147152 |
| H | -7.424620 | 2.643610  | 1.251838  |
| H | -6.799167 | 3.420884  | -0.208185 |

P

|                                               |                                    |
|-----------------------------------------------|------------------------------------|
| B3LYP SCF energy:                             | -235.85204325 a.u.                 |
| B3LYP enthalpy:                               | -235.676852 a.u.                   |
| B3LYP free energy:                            | -235.718119 a.u.                   |
| B3LYP-D3BJ SCF energy in solution:            | -235.94993962 a.u.                 |
| B3LYP-D3BJ enthalpy in solution:              | -235.774748 a.u.                   |
| B3LYP-D3BJ free energy in solution:           | -235.816015 a.u.                   |
| Three lowest frequencies (cm <sup>-1</sup> ): | 56.3631      93.4850      140.5396 |

Cartesian coordinates

| ATOM | X         | Y         | Z         |
|------|-----------|-----------|-----------|
| C    | -0.770856 | 0.924012  | 0.140008  |
| C    | -2.003824 | 0.479290  | -0.132407 |
| H    | -0.594040 | 1.997222  | 0.046172  |
| H    | -2.749671 | 1.220010  | -0.424214 |
| C    | -2.510204 | -0.935617 | -0.083213 |
| H    | -3.336466 | -1.030162 | 0.634709  |
| H    | -2.910181 | -1.240994 | -1.059722 |
| H    | -1.737966 | -1.655485 | 0.201427  |
| C    | 0.438134  | 0.125937  | 0.549561  |
| C    | 1.603287  | 0.254174  | -0.451327 |
| H    | 0.187153  | -0.933560 | 0.677955  |
| H    | 0.786089  | 0.479167  | 1.533238  |
| C    | 2.858148  | -0.503933 | -0.008186 |
| H    | 1.272533  | -0.112363 | -1.432106 |

|   |          |           |           |
|---|----------|-----------|-----------|
| H | 1.844849 | 1.317447  | -0.589289 |
| H | 3.668645 | -0.395874 | -0.737979 |
| H | 3.226369 | -0.132795 | 0.956443  |
| H | 2.654573 | -1.575799 | 0.106755  |

## References

---

- 1 a) S. Grimme, J. Antony, S. Ehrlich, H. Krieg, *J. Chem. Phys.* **2010**, *132*, 154104; b) S. Grimme, S. Ehrlich, L. Goerigk, *J. Comput. Chem.* **2011**, *32*, 1456-1465.
- 2 A. V. Marenich, C. J. Cramer, D. G. Truhlar, *J. Phys. Chem. B* **2009**, *113*, 6378.
- 3 M. J. Frisch, G. W. Trucks, H. B. Schlegel, G. E. Scuseria, M. A. Robb, J. R. Cheeseman, G. Scalmani, V. Barone, G. A. Petersson, H. Nakatsuji, X. Li, M. Caricato, A. V. Marenich, J. Bloino, B. G. Janesko, R. Gomperts, B. Mennucci, H. P. Hratchian, J. V. Ortiz, A. F. Izmaylov, J. L. Sonnenberg, D. Williams-Young, F. Ding, F. Lipparini, F. Egidi, J. Goings, B. Peng, A. Petrone, T. Henderson, D. Ranasinghe, V. G. Zakrzewski, J. Gao, N. Rega, G. Zheng, W. Liang, M. Hada, M. Ehara, K. Toyota, R. Fukuda, J. Hasegawa, M. Ishida, T. Nakajima, Y. Honda, O. Kitao, H. Nakai, T. Vreven, K. Throssell, J. A. Montgomery, Jr., J. E. Peralta, F. Ogliaro, M. J. Bearpark, J. J. Heyd, E. N. Brothers, K. N. Kudin, V. N. Staroverov, T. A. Keith, R. Kobayashi, J. Normand, K. Raghavachari, A. P. Rendell, J. C. Burant, S. S. Iyengar, J. Tomasi, M. Cossi, J. M. Millam, M. Klene, C. Adamo, R. Cammi, J. W. Ochterski, R. L. Martin, K. Morokuma, O. Farkas, J. B. Foresman, D. J. Fox, Gaussian 09, Revision D.01; Gaussian, Inc., Wallingford CT, 2009.
- 4 Y. Shao, Z. Gan, E. Epifanovsky, A. T. B. Gilbert, M. Wormit, J. Kussmann, A. W. Lange, A. Behn, J. Deng, X. Feng, D. Ghosh, M. Goldey, P. R. Horn, L. D. Jacobson, I. Kaliman, R. Z. Khaliullin, T. Kuś, A. Landau, J. Liu, E. I. Proynov, Y. M. Rhee, R. M. Richard, M. A. Rohrdanz, R. P. Steele, E. J. Sundstrom, H. L. Woodcock, P. M. Zimmerman, D. Zuev, B. Albrecht, E. Alguire, B. Austin, G. J. O. Beran, Y. A. Bernard, E. Berquist, K. Brandhorst, K. B. Bravaya, S. T. Brown, D. Casanova, C.-M. Chang, Y. Chen, S. H. Chien, K. D. Closser, D. L. Crittenden, M. Diedenhofen, R. A. DiStasio, H. Do, A. D. Dutoi, R. G. Edgar, S. Fatehi, L. Fusti-Molnar, A. Ghysels, A. Golubeva-Zadorozhnaya, J. Gomes, M. W. D. Hanson-Heine, P. H. P. Harbach, A. W. Hauser, E. G. Hohenstein, Z. C. Holden, T.-C. Jagau, H. Ji, B. Kaduk, K. Khistyayev, J. Kim, J. Kim, R. A. King, P. Klunzinger, D. Kosenkov, T. Kowalczyk, C. M. Krauter, K. U. Lao, A. D. Laurent, K. V. Lawler, S. V. Levchenko, C. Y. Lin, F. Liu, E. Livshits, R. C. Lochan, A. Luenser, P. Manohar, S. F. Manzer, S.-P. Mao, N. Mardirossian, A. V. Marenich, S. A. Maurer, N. J. Mayhall, E. Neuscamman, C. M. Oana, R. Olivares-Amaya, D. P. O'Neill, J. A. Parkhill, T. M. Perrine, R. Peverati, A. Prociuk, D. R. Rehn, E. Rosta, N. J. Russ, S. M. Sharada, S. Sharma, D. W. Small, A. Sodt, *Mol. Phys.* **2015**, *113*, 184-215.
- 5 C. Y. Legault, CYLView, 1.0b; Université de Sherbrooke: Canada, 2009, <http://www.cylview.org>.
